# Supplementary material for: Environmental fluctuations reshape an unexpected diversity-disturbance relationship in a microbial community
Source: eLife journal article supplement (doi:10.7554/elife.67175), 2021-09-03
Supplement: supp [file elife-67175-supp-v1.zip]

Archive with 17 entries (17 files):
- elife_poa_e67175_Transparent_Reporting_File.docx
- elife_poa_e67175_Figure_2_figure_supplement_1.pdf
- elife_poa_e67175_Figure_3_figure_supplement_1.pdf
- elife_poa_e67175_Figure_3_figure_supplement_2.pdf
- elife_poa_e67175_Figure_3_figure_supplement_3.jpg
- elife_poa_e67175_Figure_3_figure_supplement_4.pdf
- elife_poa_e67175_Figure_3_figure_supplement_5.pdf
- elife_poa_e67175_Figure_3_figure_supplement_6.pdf
- elife_poa_e67175_Figure_3_figure_supplement_7.pdf
- elife_poa_e67175_Figure_3_figure_supplement_8.pdf
- elife_poa_e67175_Figure_3_figure_supplement_9.pdf
- elife_poa_e67175_Figure_3_figure_supplement_10.pdf
- elife_poa_e67175_Figure_3_figure_supplement_11.pdf
- elife_poa_e67175_Figure_3_figure_supplement_12.pdf
- elife_poa_e67175_Figure_3_figure_supplement_13.pdf
- elife_poa_e67175_Figure_3_source_data_1.csv
- elife_poa_e67175_Figure_3_source_data_2.csv
