# Supplementary material for: Environmental fluctuations reshape an unexpected diversity-disturbance relationship in a microbial community
Source: eLife journal article supplement (doi:10.7554/elife.67175), 2021-09-03
Supplement: supp [file elife-67175-supp-v1.zip › elife_poa_e67175_Figure_2_figure_supplement_1.pdf]

**a**

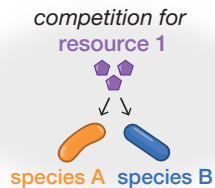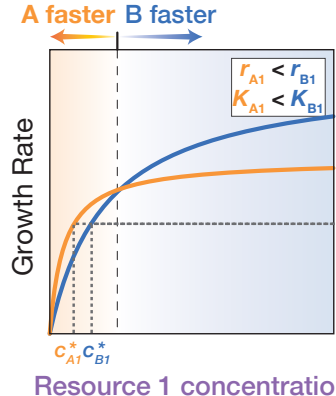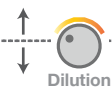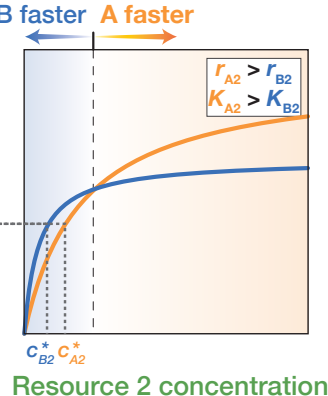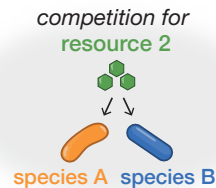

**b**

1 species grown on 2 resources

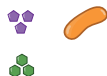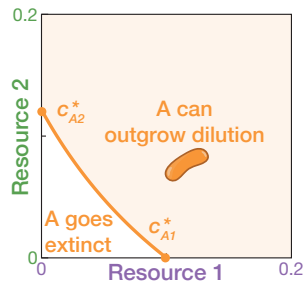

ZNGIs define resource levels where growth = dilution rate

competition w/ 2 resources, 2 species

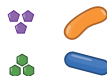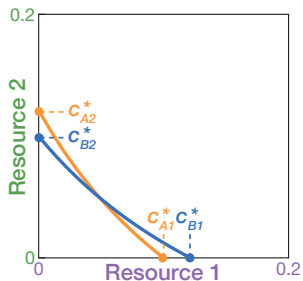

the shape of each species ZNGI depends on its growth rate curve

each species consumes different amount of each resource

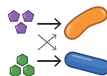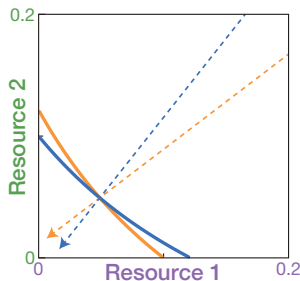

when species consume resources, they reduce nutrient concentration along their consumption vector

competition when providing different ratio of resources

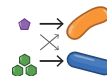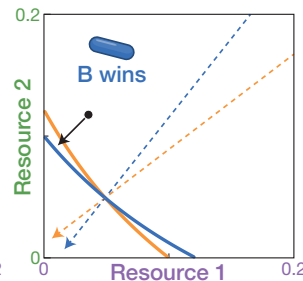

resource consumption can cause nutrient levels to drop below ZNGI, causing one species goes extinct

**COEXISTENCE**

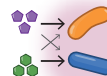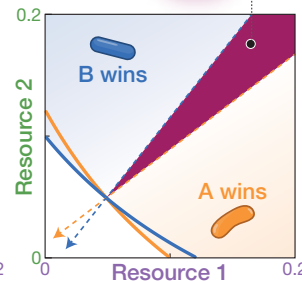

coexistence region defined where consumption can lead to ZNGI intersection, bounded by consumption vectors
