# Supplementary material for: Environmental fluctuations reshape an unexpected diversity-disturbance relationship in a microbial community
Source: eLife journal article supplement (doi:10.7554/elife.67175), 2021-09-03
Supplement: supp [file elife-67175-supp-v1.zip › elife_poa_e67175_Figure_3_source_data_1.csv]

SampleID	Nickname	Vial	Dilution	Frequency	Replicate	Day	Generations	Biofilm	DNAconc	PrepPlate	Experiment	Type	Technical Issues	SequencingType	shannon	observed_otus	PCoA1	PCoA2	colony_richness
100	s0100	100	0.1	1	1	0	0		12.8	1	1	timepoint		paired	2.417103952	39	0.316331957	-0.828539982
101	s0101	101	0.1	1	2	0	0		9.3	1	1	timepoint		paired	2.520154764	45	0.32340532	-0.829268503
102	s0102	102	0.1	1	3	0	0		8.27	1	1	timepoint		paired	2.627322136	47	0.335373088	-0.796503625
103	s0103	103	0.1	1	4	0	0		8.01	1	1	timepoint		paired	2.564328411	40	0.325284905	-0.839550208
104	s0104	104	0.1	4	1	0	0		7.71	1	1	timepoint		paired	2.51575341	43	0.333602691	-0.824183174
105	s0105	105	0.1	4	2	0	0		11.1	1	1	timepoint		paired	2.569035366	56	0.322616147	-0.822709683
106	s0106	106	0.1	4	3	0	0		9.1	1	1	timepoint		paired	2.710965744	49	0.339546509	-0.796357208
107	s0107	107	0.1	4	4	0	0		11.2	1	1	timepoint		paired	2.511992494	41	0.315339271	-0.836797769
108	s0108	108	0.1	16	1	0	0		21.1	1	1	timepoint		paired
109	s0109	109	0.1	16	2	0	0		13.2	1	1	timepoint		paired	2.437609913	40	0.307999608	-0.870530081
110	s0110	110	0.1	16	3	0	0		11.5	1	1	timepoint		paired	2.564166316	42	0.319107837	-0.836183415
111	s0111	111	0.1	16	4	0	0		11.1	1	1	timepoint		paired	2.624370089	44	0.337071489	-0.79680851
112	s0112	112	0.1	600	1	0	0		12	1	1	timepoint		paired	2.566614369	40	0.324892601	-0.83872468
114	s0114	114	0.1	600	3	0	0		14.9	1	1	timepoint		paired	2.722695062	39	0.332328816	-0.801953556
115	s0115	115	0.1	600	4	0	0		18.4	1	1	timepoint		paired	2.535746323	38	0.301729292	-0.865288498
200	s0200	200	0.2	1	1	0	0		19.6	1	1	timepoint		paired	2.348338867	30	0.309195453	-0.882972229
201	s0201	201	0.2	1	2	0	0		14.6	1	1	timepoint		paired	2.473666528	38	0.306937193	-0.886141189
202	s0202	202	0.2	1	3	0	0		10.3	1	1	timepoint		paired	2.583531096	42	0.314055862	-0.852023916
203	s0203	203	0.2	1	4	0	0		8.05	1	1	timepoint		paired	2.754105309	48	0.35029265	-0.794981437
204	s0204	204	0.2	4	1	0	0		9.79	1	1	timepoint		paired	2.606701216	43	0.328432439	-0.85534718
205	s0205	205	0.2	4	2	0	0		11.8	1	1	timepoint		paired	2.756683577	49	0.322760335	-0.82773995
206	s0206	206	0.2	4	3	0	0		11.3	1	1	timepoint		paired	2.632957294	41	0.338381255	-0.841508418
207	s0207	207	0.2	4	4	0	0		13.7	1	1	timepoint		paired	2.329974803	31	0.28271382	-0.882165814
208	s0208	208	0.2	16	1	0	0		23.8	1	1	timepoint		paired	2.359383343	33	0.296730227	-0.886364655
209	s0209	209	0.2	16	2	0	0		14	1	1	timepoint		paired	2.435415557	40	0.315798319	-0.868159238
210	s0210	210	0.2	16	3	0	0		16.4	1	1	timepoint		paired	2.66485791	45	0.32371628	-0.833269903
211	s0211	211	0.2	16	4	0	0		13.7	1	1	timepoint		paired	2.607491897	38	0.307356694	-0.859678304
212	s0212	212	0.2	600	1	0	0		14.8	1	1	timepoint		paired	2.449808176	36	0.309948221	-0.863152126
213	s0213	213	0.2	600	2	0	0		13.3	1	1	timepoint		paired	2.823923829	57	0.318237275	-0.81950552
214	s0214	214	0.2	600	3	0	0		15.6	1	1	timepoint		paired	2.571439964	40	0.309055985	-0.858964375
215	s0215	215	0.2	600	4	0	0		12.3	1	1	timepoint		paired	2.439746871	31	0.302943772	-0.870648448
300	s0300	300	0.3	1	1	0	0		14.3	1	1	timepoint		paired	2.478109377	31	0.311702903	-0.871726076
301	s0301	301	0.3	1	2	0	0		13.4	1	1	timepoint		paired	2.655360396	43	0.31852283	-0.851256197
302	s0302	302	0.3	1	3	0	0		9.09	1	1	timepoint		paired	2.812145906	50	0.348534907	-0.78703575
303	s0303	303	0.3	1	4	0	0		12.9	1	1	timepoint		paired	2.61015612	36	0.315673673	-0.840979644
304	s0304	304	0.3	4	1	0	0		13.4	1	1	timepoint		paired	2.576755354	34	0.319579899	-0.857550694
305	s0305	305	0.3	4	2	0	0		11.6	1	1	timepoint		paired	2.768363002	48	0.343358191	-0.793069026
306	s0306	306	0.3	4	3	0	0		13.7	1	1	timepoint		paired	2.573506207	40	0.326520881	-0.847545851
307	s0307	307	0.3	4	4	0	0		12.1	1	1	timepoint		paired	2.34206848	32	0.303621878	-0.877040271
308	s0308	308	0.3	16	1	0	0		33.9	1	1	timepoint		paired	2.281138989	30	0.302503619	-0.894014193
309	s0309	309	0.3	16	2	0	0		18.6	1	1	timepoint		paired	2.394926502	22	0.317978656	-0.901451471
310	s0310	310	0.3	16	3	0	0		17.6	1	1	timepoint		paired	2.662568118	46	0.329621225	-0.819808947
311	s0311	311	0.3	16	4	0	0		14.6	1	1	timepoint		paired	2.514163463	38	0.308830168	-0.841248712
312	s0312	312	0.3	600	1	0	0		17.3	1	1	timepoint		paired	2.383968167	35	0.322041546	-0.880856751
313	s0313	313	0.3	600	2	0	0		12.6	1	1	timepoint		paired	2.712477982	50	0.340636145	-0.804223042
314	s0314	314	0.3	600	3	0	0		17.6	1	1	timepoint		paired	2.371833554	34	0.307550684	-0.873075073
315	s0315	315	0.3	600	4	0	0		28	1	1	timepoint		paired	2.408657224	34	0.3228227	-0.870655242
400	s0400	400	0.4	1	1	0	0		16.3	1	1	timepoint		paired	2.546484902	34	0.332887121	-0.853637302
401	s0401	401	0.4	1	2	0	0		10.2	1	1	timepoint		paired	2.592817084	39	0.346544002	-0.834804787
402	s0402	402	0.4	1	3	0	0		10.3	1	1	timepoint		paired	2.676796116	47	0.329604876	-0.81641213
403	s0403	403	0.4	1	4	0	0		11.7	1	1	timepoint		paired	2.552545482	41	0.325184337	-0.839117958
404	s0404	404	0.4	4	1	0	0		9.62	1	1	timepoint		paired	2.512753273	45	0.321254917	-0.851233785
405	s0405	405	0.4	4	2	0	0		10.5	1	1	timepoint		paired	2.547425793	45	0.323965074	-0.840245531
406	s0406	406	0.4	4	3	0	0		12.8	1	1	timepoint		paired	2.626098927	41	0.347011948	-0.811872869
407	s0407	407	0.4	4	4	0	0		12.4	1	1	timepoint		paired	2.520676545	37	0.314336307	-0.86026536
408	s0408	408	0.4	16	1	0	0		20.9	1	1	timepoint		paired	2.311449295	24	0.338399191	-0.852344653
409	s0409	409	0.4	16	2	0	0		15.5	1	1	timepoint		paired	2.496493849	39	0.329497463	-0.870404034
410	s0410	410	0.4	16	3	0	0		12	1	1	timepoint		paired	2.475820115	39	0.326979733	-0.846980072
411	s0411	411	0.4	16	4	0	0		13.1	1	1	timepoint		paired	2.507010653	38	0.324267789	-0.858361554
412	s0412	412	0.4	600	1	0	0		12.8	1	1	timepoint		paired	2.430209393	38	0.321015271	-0.87222833
413	s0413	413	0.4	600	2	0	0		11.7	1	1	timepoint		paired	2.667779899	48	0.332208716	-0.81896856
414	s0414	414	0.4	600	3	0	0		15.5	1	1	timepoint		paired	2.679481934	39	0.345555295	-0.81221622
415	s0415	415	0.4	600	4	0	0		14.1	1	1	timepoint		paired	2.71714962	44	0.339015146	-0.797245515
500	s0500	500	0.3	1	1	0	0		30.7	7	2	timepoint		paired	2.036723731	28	0.245944192	-0.891182718
501	s0501	501	0.3	1	2	0	0		15.8	7	2	timepoint		paired	2.0657908	30	0.24558131	-0.882075438
502	s0502	502	0.3	1	3	0	0		11	7	2	timepoint		paired	2.275034076	33	0.259919517	-0.873540777
503	s0503	503	0.3	1	4	0	0		11.7	7	2	timepoint		paired	2.300654034	35	0.269335465	-0.860478179
504	s0504	504	0.6	1	1	0	0		13	7	2	timepoint		paired	2.057301308	29	0.253857886	-0.889760464
505	s0505	505	0.6	1	2	0	0		13.6	7	2	timepoint		paired	2.331149265	33	0.270900129	-0.849820065
506	s0506	506	0.6	1	3	0	0		12.5	7	2	timepoint		paired	2.185165198	28	0.263577714	-0.86791005
507	s0507	507	0.6	1	4	0	0		8.68	7	2	timepoint		paired	2.412622353	35	0.27754124	-0.831276406
508	s0508	508	0.9	1	1	0	0		26.4	7	2	timepoint		paired	2.083725297	33	0.251189946	-0.895868938
509	s0509	509	0.9	1	2	0	0		20.1	7	2	timepoint		paired	2.043129974	33	0.252621181	-0.882540717
510	s0510	510	0.9	1	3	0	0		14.9	7	2	timepoint		paired	2.243295168	35	0.271699823	-0.883941314
511	s0511	511	0.9	1	4	0	0		11.9	7	2	timepoint		paired	2.22128902	31	0.271397551	-0.868777911
512	s0512	512	1.5	1	1	0	0		11.8	7	2	timepoint		paired	2.135359288	36	0.259172504	-0.874797073
513	s0513	513	1.5	1	2	0	0		11	7	2	timepoint		paired	2.418070241	32	0.28180643	-0.847598644
514	s0514	514	1.5	1	3	0	0		12.1	7	2	timepoint		paired	2.28775719	33	0.270715018	-0.858560796
515	s0515	515	1.5	1	4	0	0		10.4	7	2	timepoint		paired	2.277070722	35	0.277096118	-0.851606801
606	s0606	606	0.6	4	3	0	0		12	7	2	timepoint		paired	2.008397889	21	0.246690403	-0.88411698
607	s0607	607	0.6	4	4	0	0		9.35	7	2	timepoint		paired	2.099328608	26	0.270009315	-0.885672727
608	s0608	608	0.9	4	1	0	0		21.5	7	2	timepoint		paired	2.117921429	32	0.256461936	-0.893044069
609	s0609	609	0.9	4	2	0	0		9.48	7	2	timepoint		paired	2.124382909	33	0.259270241	-0.894473096
610	s0610	610	0.9	4	3	0	0		10.2	7	2	timepoint		paired	2.268804306	34	0.271407309	-0.882670786
611	s0611	611	0.9	4	4	0	0		12.6	7	2	timepoint		paired	2.242925008	37	0.263360719	-0.870458524
612	s0612	612	1.5	4	1	0	0		12.1	7	2	timepoint		paired	2.065599913	36	0.253920316	-0.891087041
613	s0613	613	1.5	4	2	0	0		10.3	7	2	timepoint		paired	2.17370017	36	0.251433639	-0.88235116
614	s0614	614	1.5	4	3	0	0		12.7	7	2	timepoint		paired	2.180444898	34	0.261519923	-0.88163605
615	s0615	615	1.5	4	4	0	0		9.5	7	2	timepoint		paired	2.293577993	39	0.268857511	-0.859057582
700	s0700	700	0.3	600	1	0	0		13.6	7	2	timepoint		paired	2.459599484	42	0.269491767	-0.869758793
701	s0701	701	0.3	600	2	0	0		19.1	7	2	timepoint		paired	2.28719928	40	0.257309927	-0.892560434
702	s0702	702	0.3	600	3	0	0		13	7	2	timepoint		paired	2.19394085	35	0.254185034	-0.879369464
703	s0703	703	0.3	600	4	0	0		11	7	2	timepoint		paired	2.360913474	40	0.270566205	-0.868142712
704	s0704	704	0.6	600	1	0	0		12.7	7	2	timepoint		paired	2.221401997	38	0.261273655	-0.875132259
705	s0705	705	0.6	600	2	0	0		17.3	7	2	timepoint		paired	2.224087103	42	0.2582783	-0.868816035
706	s0706	706	0.6	600	3	0	0		11.8	7	2	timepoint		paired	2.183177876	39	0.256236496	-0.866423626
707	s0707	707	0.6	600	4	0	0		13.8	7	2	timepoint		paired	2.246193945	41	0.269311155	-0.837796933
708	s0708	708	0.9	600	1	0	0		19.2	7	2	timepoint		paired	2.028125299	33	0.24126078	-0.866569267
709	s0709	709	0.9	600	2	0	0		15.4	7	2	timepoint		paired	2.106547582	26	0.241265339	-0.876338428
710	s0710	710	0.9	600	3	0	0		15.8	7	2	timepoint		paired	2.051048302	32	0.241335274	-0.908020009
711	s0711	711	0.9	600	4	0	0		12.5	7	2	timepoint		paired	2.011901733	34	0.231423922	-0.853465841
712	s0712	712	1.5	600	1	0	0		15.7	7	2	timepoint		paired	2.126241262	38	0.250861174	-0.875342992
713	s0713	713	1.5	600	2	0	0		16.5	7	2	timepoint		paired	2.075896722	30	0.238482979	-0.87872051
714	s0714	714	1.5	600	3	0	0		19.2	7	2	timepoint		paired	2.103834328	28	0.246743144	-0.877930329
715	s0715	715	1.5	600	4	0	0		8.21	7	2	timepoint		paired	1.918982728	30	0.22867376	-0.811676216
10100	s10100	100	0.1	1	1	10	34.6		49.6	2	1	timepoint		paired	2.155419195	24	0.466047277	0.880020847
10101	s10101	101	0.1	1	2	10	34.6		34.8	2	1	timepoint		paired	2.003317553	21	0.376935652	0.945142149
10102	s10102	102	0.1	1	3	10	34.6		27.2	2	1	timepoint		paired	1.805086643	18	0.122305546	1.01338229
10103	s10103	103	0.1	1	4	10	34.6		31	2	1	timepoint		paired	1.82920614	17	0.128392677	0.992388902
10104	s10104	104	0.1	4	1	10	34.6		26	2	1	timepoint		paired	1.512496089	12	0.214911738	1.040739385
10105	s10105	105	0.1	4	2	10	34.6		14.1	2	1	timepoint		paired	1.626087862	7	-0.292719428	0.892391369
10106	s10106	106	0.1	4	3	10	34.6		21.8	2	1	timepoint		paired	1.269126474	8	-0.00025504	1.063179538
10107	s10107	107	0.1	4	4	10	34.6		28.8	2	1	timepoint		paired	1.132935591	9	0.147070426	1.130288934
10108	s10108	108	0.1	16	1	10	34.6		13.1	2	1	timepoint		paired	0.145193401	7	-1.10376444	0.075063283
10109	s10109	109	0.1	16	2	10	34.6		13.2	2	1	timepoint		paired	0.803604178	11	-0.85683897	0.325000264
10110	s10110	110	0.1	16	3	10	34.6		18.3	2	1	timepoint		paired	1.564637059	13	0.007225758	0.633288982
10111	s10111	111	0.1	16	4	10	34.6		11.3	2	1	timepoint		paired	0.517372096	5	-0.998222318	0.173295852
10112	s10112	112	0.1	600	1	10	34.6		19.8	2	1	timepoint		paired	1.396436664	5	-0.803104968	-0.056701845
10114	s10114	114	0.1	600	3	10	34.6		22.4	2	1	timepoint		paired	0.017567649	4	-1.132623023	0.067373939
10115	s10115	115	0.1	600	4	10	34.6		19.3	2	1	timepoint		paired	0.025537177	4	-1.131110194	0.067006551
1100	s1100	100	0.1	1	1	1	3.5		22	5	1	timepoint		paired	2.826148478	23	0.325346269	-0.712348362
1101	s1101	101	0.1	1	2	1	3.5		21.5	5	1	timepoint		paired	2.336265502	18	0.255206255	-0.901134254
1102	s1102	102	0.1	1	3	1	3.5		24.5	5	1	timepoint		paired	2.970694144	36	0.285068049	-0.730800237
1103	s1103	103	0.1	1	4	1	3.5		19.7	5	1	timepoint		paired	2.779917233	24	0.249922873	-0.763711074
1104	s1104	104	0.1	4	1	1	3.5		24	5	1	timepoint		paired	3.075485233	24	0.219353898	-0.670402295
1105	s1105	105	0.1	4	2	1	3.5		24.2	5	1	timepoint		paired	3.213532774	29	0.176692396	-0.648283931
1106	s1106	106	0.1	4	3	1	3.5		24.2	5	1	timepoint		paired	3.071294467	34	0.164842933	-0.683638784
1107	s1107	107	0.1	4	4	1	3.5		24.1	5	1	timepoint		paired	3.178028708	29	0.184331262	-0.652102504
1108	s1108	108	0.1	16	1	1	3.5		24.9	5	1	timepoint		paired	3.333022184	21	0.326944182	-0.614329261
1109	s1109	109	0.1	16	2	1	3.5		27.1	5	1	timepoint		paired	3.196118883	24	0.13833083	-0.663068836
1110	s1110	110	0.1	16	3	1	3.5		21	5	1	timepoint		paired	3.48827121	39	0.214474885	-0.68374832
11100	s11100	100	0.1	1	1	11	38.1		72.4	2	1	timepoint		paired	2.210959656	24	0.638348504	0.834734679
11101	s11101	101	0.1	1	2	11	38.1		66	2	1	timepoint		paired	1.80429678	19	0.506645481	0.9651949
11102	s11102	102	0.1	1	3	11	38.1		61.2	2	1	timepoint		paired	1.726618285	16	0.236838383	1.035551601
11103	s11103	103	0.1	1	4	11	38.1		75.4	2	1	timepoint		paired	1.389165363	14	0.545461413	1.11174321
11104	s11104	104	0.1	4	1	11	38.1		106	2	1	timepoint		paired	1.687763096	12	0.399561508	0.969903122
11105	s11105	105	0.1	4	2	11	38.1		30.2	2	1	timepoint		paired	1.741596291	9	-0.115964755	1.021069858
11106	s11106	106	0.1	4	3	11	38.1		43.2	2	1	timepoint		paired	1.201813956	5	-0.025121406	1.068380701
11107	s11107	107	0.1	4	4	11	38.1		51	2	1	timepoint		paired	1.152440721	9	0.103848783	1.120051492
11108	s11108	108	0.1	16	1	11	38.1		33	2	1	timepoint		paired	0.219976532	5	-1.076610984	0.101600992
11109	s11109	109	0.1	16	2	11	38.1		32.2	2	1	timepoint		paired	0.451216179	8	-0.995036674	0.17387898
1111	s1111	111	0.1	16	4	1	3.5		27.4	5	1	timepoint		paired	3.190333143	28	0.161727626	-0.687867375
11110	s11110	110	0.1	16	3	11	38.1		95.4	2	1	timepoint		paired	1.293977177	8	-0.435471508	0.466247837
11111	s11111	111	0.1	16	4	11	38.1		35	2	1	timepoint		paired	0.495007916	5	-0.981467308	0.186778287
11112	s11112	112	0.1	600	1	11	38.1		65.2	2	1	timepoint		paired	1.657062541	10	-0.668653558	-0.013281491
11114	s11114	114	0.1	600	3	11	38.1		41.4	2	1	timepoint		paired	0.048257158	10	-1.131662432	0.066631907
11115	s11115	115	0.1	600	4	11	38.1		24.8	2	1	timepoint		paired	0.03006821	4	-1.13221715	0.067212421
1112	s1112	112	0.1	600	1	1	3.5		22.5	5	1	timepoint		paired	3.343953613	29	0.25714714	-0.621506418
1114	s1114	114	0.1	600	3	1	3.5		23.9	5	1	timepoint		paired	3.45303935	31	0.196894907	-0.598956314
1115	s1115	115	0.1	600	4	1	3.5		31.1	5	1	timepoint		paired	3.406583926	31	0.217988435	-0.611173322
1200	s1200	200	0.2	1	1	1	6.9		25	5	1	timepoint		paired	2.921243933	28	0.229290688	-0.679072122
1201	s1201	201	0.2	1	2	1	6.9		17.6	5	1	timepoint		paired	2.844269006	30	0.216750512	-0.709830349
1202	s1202	202	0.2	1	3	1	6.9		23.5	5	1	timepoint		paired	3.050470834	38	0.229977414	-0.659169625
1203	s1203	203	0.2	1	4	1	6.9		18.3	5	1	timepoint		paired	2.902491789	26	0.228829564	-0.701030009
1204	s1204	204	0.2	4	1	1	6.9		19.8	5	1	timepoint		paired	3.419496717	42	0.159954261	-0.55981246
1205	s1205	205	0.2	4	2	1	6.9		24.3	5	1	timepoint		paired	3.122736199	24	0.092717065	-0.58749871
1206	s1206	206	0.2	4	3	1	6.9		20.5	5	1	timepoint		paired	3.237704268	27	0.091008174	-0.581348214
1207	s1207	207	0.2	4	4	1	6.9		22	5	1	timepoint		paired	3.219584174	32	0.165571076	-0.563187239
1208	s1208	208	0.2	16	1	1	6.9		16	5	1	timepoint		paired	2.951116866	23	0.231446771	-0.485637809
1209	s1209	209	0.2	16	2	1	6.9		14.3	5	1	timepoint		paired	2.97007151	27	0.244034127	-0.45805514
1210	s1210	210	0.2	16	3	1	6.9		13.7	5	1	timepoint		paired	3.445933146	43	-0.004835485	-0.352648108
12100	s12100	100	0.1	1	1	12	41.6	0.02575688	42.4	2	1	timepoint		paired	2.272062005	27	0.517277102	0.834688912
12101	s12101	101	0.1	1	2	12	41.6	0.084273611	39	2	1	timepoint		paired	1.929583153	21	0.271392941	0.954079961
12102	s12102	102	0.1	1	3	12	41.6	0.044321877	44	2	1	timepoint		paired	1.538717844	17	-0.212731085	0.892326588
12103	s12103	103	0.1	1	4	12	41.6	0.040687389	48.2	2	1	timepoint		paired	1.778337217	16	-0.022450716	0.953048225
12104	s12104	104	0.1	4	1	12	41.6	0.026236063	45.4	2	1	timepoint		paired	1.759182652	16	0.299378951	0.961939018
12105	s12105	105	0.1	4	2	12	41.6	0.043267924	35.6	2	1	timepoint		paired	1.670451298	16	-0.251613267	0.946982088
12106	s12106	106	0.1	4	3	12	41.6	0.035340826	40.6	2	1	timepoint		paired	1.218035529	12	-0.045180481	1.06451956
12107	s12107	107	0.1	4	4	12	41.6	0.057289189	32.8	2	1	timepoint		paired	1.164538527	10	0.000596455	1.099089246
12108	s12108	108	0.1	16	1	12	41.6	0.115196298	34	2	1	timepoint		paired	0.417711307	7	-1.008245044	0.160250654
12109	s12109	109	0.1	16	2	12	41.6	0.165890215	31.2	2	1	timepoint		paired	0.475852689	6	-0.954178266	0.220918265
1211	s1211	211	0.2	16	4	1	6.9		19.2	5	1	timepoint		paired	3.089359974	32	0.053432333	-0.492354725
12110	s12110	110	0.1	16	3	12	41.6	0.031814056	26.4	2	1	timepoint		paired	1.379641959	10	-0.37540707	0.403265835
12111	s12111	111	0.1	16	4	12	41.6	0.12611861	18.5	2	1	timepoint		paired	0.744127462	11	-0.846451828	0.352365401
12112	s12112	112	0.1	600	1	12	41.6	0.027740181	32.4	2	1	timepoint		paired	1.737275097	12	-0.649316634	0.117843147
12114	s12114	114	0.1	600	3	12	41.6	0.046937948	50	2	1	timepoint		paired	0.14982627	13	-1.165499652	0.066403987
12115	s12115	115	0.1	600	4	12	41.6	0.053891814	24.6	2	1	timepoint		paired	0.113061429	9	-1.155020843	0.066292713
1212	s1212	212	0.2	600	1	1	6.9		17.9	5	1	timepoint		paired	2.54850353	31	0.011797452	-0.501244438
1213	s1213	213	0.2	600	2	1	6.9		18.1	5	1	timepoint		paired	3.2555884	34	0.18920385	-0.330846151
1214	s1214	214	0.2	600	3	1	6.9		21.3	5	1	timepoint		paired	2.768861282	26	0.013794185	-0.526873895
1215	s1215	215	0.2	600	4	1	6.9		16.6	5	1	timepoint		paired	3.134979797	31	-0.003193878	-0.343522101
1300	s1300	300	0.3	1	1	1	10.4		25.8	5	1	timepoint		paired	2.577179047	14	0.181548869	-0.729467828
1301	s1301	301	0.3	1	2	1	10.4		16.6	5	1	timepoint		paired	2.41074772	15	0.13976463	-0.719862211
1302	s1302	302	0.3	1	3	1	10.4		19.7	5	1	timepoint		paired	2.831092946	36	0.220723892	-0.692893501
1303	s1303	303	0.3	1	4	1	10.4		21.4	5	1	timepoint		paired	2.605668976	19	0.206531172	-0.716470597
1304	s1304	304	0.3	4	1	1	10.4		20	5	1	timepoint		paired	3.01245113	25	0.176949694	-0.662171497
1305	s1305	305	0.3	4	2	1	10.4		20.3	5	1	timepoint		paired	3.05039901	30	0.108766516	-0.631835646
1306	s1306	306	0.3	4	3	1	10.4		19.4	5	1	timepoint		paired	3.072399807	27	0.10160664	-0.576834242
1307	s1307	307	0.3	4	4	1	10.4		14.8	5	1	timepoint		paired	3.046618243	27	0.112359275	-0.580720854
1308	s1308	308	0.3	16	1	1	10.4		19.2	5	1	timepoint		paired
1309	s1309	309	0.3	16	2	1	10.4		17.6	5	1	timepoint		paired	2.268166931	24	0.090008304	-0.711482887
1310	s1310	310	0.3	16	3	1	10.4		18.2	5	1	timepoint		paired	3.223111796	38	0.01180146	-0.473160603
1311	s1311	311	0.3	16	4	1	10.4		21	5	1	timepoint		paired	2.853105517	24	-0.154008781	-0.432568585
1312	s1312	312	0.3	600	1	1	10.4		22.6	5	1	timepoint		paired	2.586478528	26	-0.070701967	-0.47895668
1313	s1313	313	0.3	600	2	1	10.4		17.4	5	1	timepoint		paired	2.187287547	20	-0.161381525	-0.484101026
1314	s1314	314	0.3	600	3	1	10.4		18.5	5	1	timepoint		paired	1.993243604	21	-0.166163735	-0.509445511
1315	s1315	315	0.3	600	4	1	10.4		22.3	5	1	timepoint		paired	2.803084125	26	-0.086254783	-0.515576948
1400	s1400	400	0.4	1	1	1	13.9		30.4	5	1	timepoint		paired	2.531075475	14	0.231656269	-0.755328781
1401	s1401	401	0.4	1	2	1	13.9		24.8	5	1	timepoint		paired	1.891985479	15	0.175229087	-0.825410747
1402	s1402	402	0.4	1	3	1	13.9		32.9	5	1	timepoint		paired	2.780032013	34	0.180861167	-0.675780041
1403	s1403	403	0.4	1	4	1	13.9		33.9	5	1	timepoint		paired	2.404087765	18	0.145802517	-0.706211291
1404	s1404	404	0.4	4	1	1	13.9		22.9	5	1	timepoint		paired	2.790703705	24	0.226979063	-0.6616749
1405	s1405	405	0.4	4	2	1	13.9		27.8	5	1	timepoint		paired	2.809849096	24	0.035605852	-0.590674991
1406	s1406	406	0.4	4	3	1	13.9		22.9	5	1	timepoint		paired	2.824658221	18	0.136462727	-0.598458041
1407	s1407	407	0.4	4	4	1	13.9		26.4	5	1	timepoint		paired	2.977158854	22	0.213003182	-0.529743636
1408	s1408	408	0.4	16	1	1	13.9		21.3	5	1	timepoint		paired	2.781162543	22	0.091189329	-0.583363929
1409	s1409	409	0.4	16	2	1	13.9		20.2	5	1	timepoint		paired	2.840138916	26	0.02151981	-0.578597011
1410	s1410	410	0.4	16	3	1	13.9		20.2	5	1	timepoint		paired	2.991468194	28	0.001987817	-0.476717009
1411	s1411	411	0.4	16	4	1	13.9		22.2	5	1	timepoint		paired	2.882212347	21	-0.011904811	-0.560651283
1412	s1412	412	0.4	600	1	1	13.9		18.6	5	1	timepoint		paired	2.892197267	35	-0.022263513	-0.502501645
1413	s1413	413	0.4	600	2	1	13.9		20.1	5	1	timepoint		paired	2.631631064	25	-0.133720968	-0.516722267
1414	s1414	414	0.4	600	3	1	13.9		19.4	5	1	timepoint		paired	2.373241031	22	-0.175640685	-0.507707477
1415	s1415	415	0.4	600	4	1	13.9		19.3	5	1	timepoint		paired	2.567623597	26	-0.071342659	-0.560307615
R1500	s1500	500	0.3	1	1	1	10.3875		19.5	9	2	timepoint		single
R1501	s1501	501	0.3	1	2	1	10.3875		21.9	9	2	timepoint		single
R1502	s1502	502	0.3	1	3	1	10.3875		22.7	9	2	timepoint		single
R1503	s1503	503	0.3	1	4	1	10.3875		19.2	9	2	timepoint		single
R1504	s1504	504	0.6	1	1	1	20.775		17	9	2	timepoint		single
R1505	s1505	505	0.6	1	2	1	20.775		17	9	2	timepoint		single
R1506	s1506	506	0.6	1	3	1	20.775		25.7	9	2	timepoint		single
R1507	s1507	507	0.6	1	4	1	20.775		21	9	2	timepoint		single	5.269890785	47	0	0
R1508	s1508	508	0.9	1	1	1	31.1625		14.1	9	2	timepoint		single
R1509	s1509	509	0.9	1	2	1	31.1625		13.7	9	2	timepoint		single
R1510	s1510	510	0.9	1	3	1	31.1625		24.3	9	2	timepoint		single
R1511	s1511	511	0.9	1	4	1	31.1625		24	9	2	timepoint		single
R1512	s1512	512	1.5	1	1	1	51.9375		23.6	9	2	timepoint		single
R1513	s1513	513	1.5	1	2	1	51.9375		21.2	9	2	timepoint		single
R1514	s1514	514	1.5	1	3	1	51.9375		18.5	9	2	timepoint		single
R1515	s1515	515	1.5	1	4	1	51.9375		14.8	9	2	timepoint		single
R1606	s1606	606	0.6	4	3	1	20.775		18.3	9	2	timepoint		single
R1607	s1607	607	0.6	4	4	1	20.775		18.5	9	2	timepoint		single
R1608	s1608	608	0.9	4	1	1	31.1625		21.1	9	2	timepoint		single
R1609	s1609	609	0.9	4	2	1	31.1625		14.3	9	2	timepoint		single
R1610	s1610	610	0.9	4	3	1	31.1625		18.8	9	2	timepoint		single
R1611	s1611	611	0.9	4	4	1	31.1625		16.1	9	2	timepoint		single
R1612	s1612	612	1.5	4	1	1	51.9375		17.5	9	2	timepoint		single
R1613	s1613	613	1.5	4	2	1	51.9375		17.1	9	2	timepoint		single	5.116737921	44	0.123916706	-0.625669604
R1614	s1614	614	1.5	4	3	1	51.9375		18.1	9	2	timepoint		single
R1615	s1615	615	1.5	4	4	1	51.9375		16.1	9	2	timepoint		single
R1700	s1700	700	0.3	600	1	1	10.3875		14	9	2	timepoint		single
R1701	s1701	701	0.3	600	2	1	10.3875		15.5	9	2	timepoint		single	4.776380418	39	0.24327124	-0.451767586
R1702	s1702	702	0.3	600	3	1	10.3875		19.9	9	2	timepoint		single
R1703	s1703	703	0.3	600	4	1	10.3875		12.9	9	2	timepoint		single
R1704	s1704	704	0.6	600	1	1	20.775		8.34	9	2	timepoint		single
R1705	s1705	705	0.6	600	2	1	20.775		9.69	9	2	timepoint		single	4.745363981	32	0.027538457	-0.758185465
R1706	s1706	706	0.6	600	3	1	20.775		11.5	9	2	timepoint		single	4.753057285	33	0.002225536	-0.682087481
R1707	s1707	707	0.6	600	4	1	20.775		12.6	9	2	timepoint		single
R1708	s1708	708	0.9	600	1	1	31.1625		10.5	9	2	timepoint		single
R1709	s1709	709	0.9	600	2	1	31.1625		9.59	9	2	timepoint		single
R1710	s1710	710	0.9	600	3	1	31.1625		10.9	9	2	timepoint		single
R1711	s1711	711	0.9	600	4	1	31.1625		13	9	2	timepoint		single
R1712	s1712	712	1.5	600	1	1	51.9375		6.3	9	2	timepoint		single
R1713	s1713	713	1.5	600	2	1	51.9375		9.33	9	2	timepoint		single	5.173503219	46	0.02321148	-0.66028323
R1714	s1714	714	1.5	600	3	1	51.9375		7.83	9	2	timepoint		single	5.171298097	47	-0.001490628	-0.666786892
R1715	s1715	715	1.5	600	4	1	51.9375		6.34	9	2	timepoint		single
2100	s2100	100	0.1	1	1	2	6.9		23.1	3	1	timepoint		paired	2.948519609	23	0.183114966	-0.647616861
2101	s2101	101	0.1	1	2	2	6.9		38.7	3	1	timepoint		paired	2.963398538	26	0.125576257	-0.571716606
2102	s2102	102	0.1	1	3	2	6.9		27.7	3	1	timepoint		paired	3.229057475	27	0.167905304	-0.523874785
2103	s2103	103	0.1	1	4	2	6.9		19.2	3	1	timepoint		paired	3.103292251	23	0.196650916	-0.542776614
2104	s2104	104	0.1	4	1	2	6.9		17.3	3	1	timepoint		paired	3.149172834	25	-0.172758514	0.189566963
2105	s2105	105	0.1	4	2	2	6.9		26.9	3	1	timepoint		paired	2.875778511	27	-0.28958022	0.215717207
2106	s2106	106	0.1	4	3	2	6.9		31	3	1	timepoint		paired	3.289228052	25	0.217485565	-0.290537189
2107	s2107	107	0.1	4	4	2	6.9		23.8	3	1	timepoint		paired	3.35754937	25	0.022884356	-0.276656477
2108	s2108	108	0.1	16	1	2	6.9		22.8	3	1	timepoint		paired	3.041530034	26	-0.234223033	0.178182759
2109	s2109	109	0.1	16	2	2	6.9		23	3	1	timepoint		paired	3.390107624	27	-0.161985137	-0.243182478
2110	s2110	110	0.1	16	3	2	6.9		21.2	3	1	timepoint		paired	3.362267424	25	-0.136763157	-0.388365901
2111	s2111	111	0.1	16	4	2	6.9		21.6	3	1	timepoint		paired	3.474931371	25	-0.109994615	-0.22579118
2112	s2112	112	0.1	600	1	2	6.9		23.2	3	1	timepoint		paired	2.515852324	23	-0.292317841	0.323747684
2114	s2114	114	0.1	600	3	2	6.9		20.2	3	1	timepoint		paired	3.398689779	27	0.118122424	0.032278898
2115	s2115	115	0.1	600	4	2	6.9		25.7	3	1	timepoint		paired	3.048352404	26	-0.293566604	0.050982197
2200	s2200	200	0.2	1	1	2	13.9		24.5	3	1	timepoint		paired	2.601396559	19	0.116651617	-0.616378551
2201	s2201	201	0.2	1	2	2	13.9		18.2	3	1	timepoint		paired	2.92660492	24	0.143990051	-0.535454701
2202	s2202	202	0.2	1	3	2	13.9		27.2	3	1	timepoint		paired	2.818736179	21	0.166157922	-0.52677105
2203	s2203	203	0.2	1	4	2	13.9		21.2	3	1	timepoint		paired	2.706248683	18	0.128251469	-0.646173064
2204	s2204	204	0.2	4	1	2	13.9		23.6	3	1	timepoint		paired	2.984263315	24	-0.111673534	0.102650153
2205	s2205	205	0.2	4	2	2	13.9		22.2	3	1	timepoint		paired	3.023516501	25	-0.1263742	-0.020492415
2206	s2206	206	0.2	4	3	2	13.9		26.1	3	1	timepoint		paired	3.132270497	23	0.107612516	0.153425264
2207	s2207	207	0.2	4	4	2	13.9		33.5	3	1	timepoint		paired	3.012865751	21	0.015181238	0.053486248
2208	s2208	208	0.2	16	1	2	13.9		17.4	3	1	timepoint		paired	1.344103698	15	-0.846319889	0.072092075
2209	s2209	209	0.2	16	2	2	13.9		15.2	3	1	timepoint		paired	1.633223434	24	-0.76745294	0.10105833
2210	s2210	210	0.2	16	3	2	13.9		14.5	3	1	timepoint		paired	1.733433504	24	-0.753118907	0.141545218
2211	s2211	211	0.2	16	4	2	13.9		15.4	3	1	timepoint		paired	2.249646486	20	-0.596291557	0.228906915
2212	s2212	212	0.2	600	1	2	13.9		13.4	3	1	timepoint		paired	1.288324263	16	-0.835286807	0.015904055
2213	s2213	213	0.2	600	2	2	13.9		9.32	3	1	timepoint		paired	0.832723256	18	-0.935060782	0.015350197
2214	s2214	214	0.2	600	3	2	13.9		14.9	3	1	timepoint		paired	1.485795332	10	-0.692145338	-0.088575168
2215	s2215	215	0.2	600	4	2	13.9		15.9	3	1	timepoint		paired	1.238767978	18	-0.854270648	0.011704384
2300	s2300	300	0.3	1	1	2	20.8		29.3	3	1	timepoint		paired	2.680704163	17	0.407972503	-0.36220753
2301	s2301	301	0.3	1	2	2	20.8		29.4	3	1	timepoint		paired	2.693272362	21	0.298299174	-0.445744095
2302	s2302	302	0.3	1	3	2	20.8		27.8	3	1	timepoint		paired	2.659228706	17	0.140258247	-0.539617022
2303	s2303	303	0.3	1	4	2	20.8		32	3	1	timepoint		paired	2.623213609	16	0.389607181	-0.386837127
2304	s2304	304	0.3	4	1	2	20.8		22.4	3	1	timepoint		paired	3.260657104	23	0.302030684	0.005085843
2305	s2305	305	0.3	4	2	2	20.8		15	3	1	timepoint		paired	3.178890677	24	-0.083200808	-0.041043767
2306	s2306	306	0.3	4	3	2	20.8		23.2	3	1	timepoint		paired	3.094778302	22	0.212118948	0.334802758
2307	s2307	307	0.3	4	4	2	20.8		29.3	3	1	timepoint		paired	3.030590121	26	0.049495575	-0.04028568
2308	s2308	308	0.3	16	1	2	20.8		8.27	3	1	timepoint		paired	2.156434799	19	-0.537150205	0.076086068
2309	s2309	309	0.3	16	2	2	20.8		10.5	3	1	timepoint		paired	2.1995091	23	-0.641493701	-0.019481988
2310	s2310	310	0.3	16	3	2	20.8		9.16	3	1	timepoint		paired	1.841104618	23	-0.704909322	-0.030939164
2311	s2311	311	0.3	16	4	2	20.8		11.6	3	1	timepoint		paired	1.92190174	20	-0.706551111	0.113170462
2312	s2312	312	0.3	600	1	2	20.8		15	3	1	timepoint		paired	2.121712211	17	-0.667355721	0.065773521
2313	s2313	313	0.3	600	2	2	20.8		11	3	1	timepoint		paired
2314	s2314	314	0.3	600	3	2	20.8		12	3	1	timepoint		paired	1.587828292	20	-0.818221546	0.008937975
2315	s2315	315	0.3	600	4	2	20.8		18.7	3	1	timepoint		paired	1.279184934	16	-0.856635417	-0.055062977
2400	s2400	400	0.4	1	1	2	27.7		31.3	3	1	timepoint		paired	2.724855362	16	0.204019195	-0.478597904
2401	s2401	401	0.4	1	2	2	27.7		23.5	3	1	timepoint		paired	2.612218334	18	0.374074231	-0.418447937
2402	s2402	402	0.4	1	3	2	27.7		24.5	3	1	timepoint		paired	2.759057097	20	0.135864901	-0.460551501
2403	s2403	403	0.4	1	4	2	27.7		28.6	3	1	timepoint		paired	2.549320969	15	0.303922902	-0.405825997
2404	s2404	404	0.4	4	1	2	27.7		23.2	3	1	timepoint		paired	3.278099714	20	0.380894286	-0.111740766
2405	s2405	405	0.4	4	2	2	27.7		29.2	3	1	timepoint		paired	2.979341327	21	0.051056279	0.141965979
2406	s2406	406	0.4	4	3	2	27.7		30	3	1	timepoint		paired	3.207599364	21	0.322884812	0.277210383
2407	s2407	407	0.4	4	4	2	27.7		22.5	3	1	timepoint		paired	3.086891195	18	0.658055681	0.336628398
2408	s2408	408	0.4	16	1	2	27.7		15.6	3	1	timepoint		paired	2.253780141	16	-0.43606561	-0.25611458
2409	s2409	409	0.4	16	2	2	27.7		13.4	3	1	timepoint		paired	2.647834219	22	-0.211866843	-0.173106502
2410	s2410	410	0.4	16	3	2	27.7		13.8	3	1	timepoint		paired	2.599813218	22	-0.045426288	-0.075598869
2411	s2411	411	0.4	16	4	2	27.7		32.9	3	1	timepoint		paired	2.776237686	17	0.330083098	-0.030246582
2412	s2412	412	0.4	600	1	2	27.7		19.8	3	1	timepoint		paired	2.185778009	20	-0.476899453	-0.211904723
2413	s2413	413	0.4	600	2	2	27.7		13.8	3	1	timepoint		paired	2.010641684	22	-0.535765861	-0.23151262
2414	s2414	414	0.4	600	3	2	27.7		18.2	3	1	timepoint		paired	2.723514003	21	-0.228711014	-0.231119853
2415	s2415	415	0.4	600	4	2	27.7		15.4	3	1	timepoint		paired	2.23538731	21	-0.468727008	-0.26233762
2500	s2500	500	0.3	1	1	2	20.775		17.8	7	2	timepoint		paired	2.819142839	24	0.343700854	-0.51766546
2501	s2501	501	0.3	1	2	2	20.775		20.9	7	2	timepoint		paired	2.785439142	24	0.371052106	-0.455124704
2502	s2502	502	0.3	1	3	2	20.775		16.5	7	2	timepoint		paired	2.828455179	20	0.320153235	-0.341575289
2503	s2503	503	0.3	1	4	2	20.775		12.8	7	2	timepoint		paired	2.809536942	24	0.286482775	-0.491487147
2504	s2504	504	0.6	1	1	2	41.55		16.6	7	2	timepoint		paired	2.925774486	26	0.365188898	-0.513332936
2505	s2505	505	0.6	1	2	2	41.55		18	7	2	timepoint		paired	2.959556633	23	0.437353319	-0.350026384
2506	s2506	506	0.6	1	3	2	41.55		16	7	2	timepoint		paired	2.78994807	22	0.43402037	-0.460184885
2507	s2507	507	0.6	1	4	2	41.55		19.9	7	2	timepoint		paired	2.820329903	22	0.507278738	-0.357006891
2508	s2508	508	0.9	1	1	2	62.325		13.8	7	2	timepoint		paired	2.730157384	18	0.422107104	-0.411065496
2509	s2509	509	0.9	1	2	2	62.325		14	7	2	timepoint		paired	2.917702014	21	0.451994006	-0.399419974
2510	s2510	510	0.9	1	3	2	62.325		13.9	7	2	timepoint		paired	2.934085263	18	0.287511198	-0.365427615
2511	s2511	511	0.9	1	4	2	62.325		14.2	7	2	timepoint		paired	2.835967706	21	0.416592737	-0.436073561
2512	s2512	512	1.5	1	1	2	103.875		16.2	7	2	timepoint		paired	2.960717881	23	0.395675067	-0.437742813
2513	s2513	513	1.5	1	2	2	103.875		18.4	7	2	timepoint		paired	2.925785671	16	0.474907895	-0.205389725
2514	s2514	514	1.5	1	3	2	103.875		13	7	2	timepoint		paired	2.823809548	20	0.486029668	-0.360663575
2515	s2515	515	1.5	1	4	2	103.875		12.9	7	2	timepoint		paired	2.910886617	22	0.387197873	-0.507319141
2606	s2606	606	0.6	4	3	2	41.55		15.5	7	2	timepoint		paired	3.141609822	24	0.597150892	0.06296462
2607	s2607	607	0.6	4	4	2	41.55		17	7	2	timepoint		paired	2.801068506	15	0.624628126	0.196415078
2608	s2608	608	0.9	4	1	2	62.325		12.4	7	2	timepoint		paired	2.867019571	22	0.734837596	0.355140223
2609	s2609	609	0.9	4	2	2	62.325		15.5	7	2	timepoint		paired	2.669309455	20	0.823477819	0.427563371
2610	s2610	610	0.9	4	3	2	62.325		13.5	7	2	timepoint		paired	3.12959488	19	0.725948211	0.21083502
2611	s2611	611	0.9	4	4	2	62.325		6.49	7	2	timepoint		paired	2.767237889	19	0.839913542	0.45695012
2612	s2612	612	1.5	4	1	2	103.875		8.27	7	2	timepoint		paired	2.645423148	17	0.865291622	0.418043759
2613	s2613	613	1.5	4	2	2	103.875		13.2	7	2	timepoint		paired	2.907572107	18	0.817770232	0.319672724
2614	s2614	614	1.5	4	3	2	103.875		14.9	7	2	timepoint		paired	2.819367219	22	0.898141245	0.490406056
2615	s2615	615	1.5	4	4	2	103.875		12.6	7	2	timepoint		paired	2.615996083	19	0.81346893	0.439085833
2700	s2700	700	0.3	600	1	2	20.775		5.96	7	2	timepoint		paired	2.064436732	19	-0.569008388	-0.174233754
2701	s2701	701	0.3	600	2	2	20.775		9.43	7	2	timepoint		paired	2.075717204	15	-0.294522689	-0.351652106
2702	s2702	702	0.3	600	3	2	20.775		9.55	7	2	timepoint		paired	2.196053857	20	-0.377074392	-0.328716605
2703	s2703	703	0.3	600	4	2	20.775		6.94	7	2	timepoint		paired	1.817762856	15	-0.653233974	-0.184860132
2704	s2704	704	0.6	600	1	2	41.55		5.87	7	2	timepoint		paired	2.138207463	19	0.022419434	-0.540840289
2705	s2705	705	0.6	600	2	2	41.55		6.24	7	2	timepoint		paired	2.517780033	22	-0.011767353	-0.473493222
2706	s2706	706	0.6	600	3	2	41.55		5.79	7	2	timepoint		paired	2.317122877	16	-0.010681369	-0.497486078
2707	s2707	707	0.6	600	4	2	41.55		6.71	7	2	timepoint		paired	2.490993739	20	0.147661032	-0.464825435
2708	s2708	708	0.9	600	1	2	62.325		7.14	7	2	timepoint		paired	2.651721925	27	0.33016155	-0.56706237
2709	s2709	709	0.9	600	2	2	62.325		6.96	7	2	timepoint		paired	2.518577111	31	0.28890646	-0.703004796
2710	s2710	710	0.9	600	3	2	62.325		6.68	7	2	timepoint		paired	2.594725383	29	0.386104781	-0.676536533
2711	s2711	711	0.9	600	4	2	62.325		8.47	7	2	timepoint		paired	3.104112801	23	0.329569542	-0.366124268
2712	s2712	712	1.5	600	1	2	103.875		4.83	7	2	timepoint		paired	2.975763567	30	0.2961668	-0.54517052
2713	s2713	713	1.5	600	2	2	103.875		6.61	7	2	timepoint		paired	3.021464513	28	0.224881433	-0.601750612
2714	s2714	714	1.5	600	3	2	103.875		6.26	7	2	timepoint		paired	2.937263653	27	0.245577904	-0.51672848
2715	s2715	715	1.5	600	4	2	103.875		5.1	7	2	timepoint		paired	2.989105116	26	0.409861795	-0.393794873
3100	s3100	100	0.1	1	1	3	10.4		53	5	1	timepoint		paired	3.120855099	20	0.058114221	-0.367640343
3101	s3101	101	0.1	1	2	3	10.4		66.6	5	1	timepoint		paired	3.279646419	31	0.2211155	-0.42782508
3102	s3102	102	0.1	1	3	3	10.4		41.2	5	1	timepoint		paired	3.013911068	26	-0.008012521	-0.416720889
3103	s3103	103	0.1	1	4	3	10.4		39.2	5	1	timepoint		paired	2.981924196	23	0.040118541	-0.468582381
3104	s3104	104	0.1	4	1	3	10.4		80.2	5	1	timepoint		paired	2.564501383	25	0.596851583	0.674076869
3105	s3105	105	0.1	4	2	3	10.4		37.6	5	1	timepoint		paired	1.955171688	19	-0.517309598	0.427800206
3106	s3106	106	0.1	4	3	3	10.4		50	5	1	timepoint		paired	2.72692457	21	0.542901328	0.554073734
3107	s3107	107	0.1	4	4	3	10.4		41.8	5	1	timepoint		paired	2.412302656	26	0.329028594	0.791371498
3108	s3108	108	0.1	16	1	3	10.4		77.8	5	1	timepoint		paired	1.450620251	13	-0.511398361	0.600001535
3109	s3109	109	0.1	16	2	3	10.4		43.7	5	1	timepoint		paired
3110	s3110	110	0.1	16	3	3	10.4		43.4	5	1	timepoint		paired	2.441997716	21	-0.666883833	0.047688956
3111	s3111	111	0.1	16	4	3	10.4		35.7	5	1	timepoint		paired	2.581564262	20	-0.241047936	0.497484168
3112	s3112	112	0.1	600	1	3	10.4		24.4	5	1	timepoint		paired	1.896403922	20	-0.65570279	0.148651453
3114	s3114	114	0.1	600	3	3	10.4		34.7	5	1	timepoint		paired	1.857955423	16	-0.587599093	0.340247437
3115	s3115	115	0.1	600	4	3	10.4		18.7	5	1	timepoint		paired	2.609302299	26	-0.062546974	0.616244019
3200	s3200	200	0.2	1	1	3	20.8		34.2	5	1	timepoint		paired	2.953973397	12	0.376514367	-0.255959673
3201	s3201	201	0.2	1	2	3	20.8		17.4	5	1	timepoint		paired	2.768166795	13	0.463903051	-0.320639542
3202	s3202	202	0.2	1	3	3	20.8		29	5	1	timepoint		paired	2.794205231	19	0.227528293	-0.379073101
3203	s3203	203	0.2	1	4	3	20.8		30.8	5	1	timepoint		paired	2.881927123	17	0.241203048	-0.429355852
3204	s3204	204	0.2	4	1	3	20.8		24.8	5	1	timepoint		paired	1.733525539	18	-0.02142721	0.998935878
3205	s3205	205	0.2	4	2	3	20.8		20	5	1	timepoint		paired	2.12183789	16	-0.016050889	0.874022161
3206	s3206	206	0.2	4	3	3	20.8		20.6	5	1	timepoint		paired	1.692829539	14	-0.330932566	0.738467133
3207	s3207	207	0.2	4	4	3	20.8		25.4	5	1	timepoint		paired	1.818147541	17	0.171884941	1.033586261
3208	s3208	208	0.2	16	1	3	20.8		15.2	5	1	timepoint		paired
3209	s3209	209	0.2	16	2	3	20.8		12.7	5	1	timepoint		paired	0.451274129	13	-1.088020759	0.073275417
3210	s3210	210	0.2	16	3	3	20.8		12.6	5	1	timepoint		paired	0.310348616	8	-1.075503865	0.063512836
3211	s3211	211	0.2	16	4	3	20.8		14.7	5	1	timepoint		paired	0.478320398	12	-1.07665098	0.094582762
3212	s3212	212	0.2	600	1	3	20.8		18.1	5	1	timepoint		paired	0.29813691	9	-1.137067173	0.062167366
3213	s3213	213	0.2	600	2	3	20.8		11.2	5	1	timepoint		paired	0.123558895	10	-1.122645182	0.064735242
3214	s3214	214	0.2	600	3	3	20.8		14.8	5	1	timepoint		paired	0.384511494	13	-1.043544283	0.028883169
3215	s3215	215	0.2	600	4	3	20.8		13.8	5	1	timepoint		paired	0.322086708	18	-1.110665238	0.060343776
3300	s3300	300	0.3	1	1	3	31.2		34.6	6	1	timepoint		paired	2.968298116	17	0.662587155	0.081804146
3301	s3301	301	0.3	1	2	3	31.2		34.6	6	1	timepoint		paired	2.597746971	15	0.302432989	-0.236985625
3302	s3302	302	0.3	1	3	3	31.2		27.2	6	1	timepoint		paired	2.595109397	17	0.264351472	-0.448132138
3303	s3303	303	0.3	1	4	3	31.2		38	6	1	timepoint		paired	2.985066325	19	0.663394586	0.085510874
3304	s3304	304	0.3	4	1	3	31.2		29.4	6	1	timepoint		paired	2.513989254	18	0.522015629	0.796054384
3305	s3305	305	0.3	4	2	3	31.2		16.7	6	1	timepoint		paired	2.206998068	13	0.243896664	0.987172457
3306	s3306	306	0.3	4	3	3	31.2		33.8	6	1	timepoint		paired	2.186983356	14	0.4693693	1.099783112
3307	s3307	307	0.3	4	4	3	31.2		29.8	6	1	timepoint		paired	1.94469381	14	0.36067085	0.982234592
3308	s3308	308	0.3	16	1	3	31.2		10.4	6	1	timepoint		paired	0.608515798	10	-0.978132868	0.161380684
3309	s3309	309	0.3	16	2	3	31.2		10.8	6	1	timepoint		paired	1.403790484	16	-0.875246021	0.086582637
3310	s3310	310	0.3	16	3	3	31.2		10	6	1	timepoint		paired	1.168851351	20	-0.968353651	0.095198362
3311	s3311	311	0.3	16	4	3	31.2		8.78	6	1	timepoint		paired	0.629673637	7	-1.026380498	0.074882859
3312	s3312	312	0.3	600	1	3	31.2		8.08	6	1	timepoint		paired
3313	s3313	313	0.3	600	2	3	31.2		13.5	6	1	timepoint		paired	1.55272816	18	-0.664288936	-0.156759519
3314	s3314	314	0.3	600	3	3	31.2		13.3	6	1	timepoint		paired	2.171706359	16	-0.618092062	0.005119766
3315	s3315	315	0.3	600	4	3	31.2		12.4	6	1	timepoint		paired	0.424172404	16	-1.06303928	0.043638581
3400	s3400	400	0.4	1	1	3	41.6		25.6	6	1	timepoint		paired	2.342721152	14	0.793378208	0.706885721
3401	s3401	401	0.4	1	2	3	41.6		24.6	6	1	timepoint		paired	2.730112206	15	0.68174273	0.082661401
3402	s3402	402	0.4	1	3	3	41.6		25.4	6	1	timepoint		paired	2.552754245	16	0.286936881	-0.293717463
3403	s3403	403	0.4	1	4	3	41.6		41	6	1	timepoint		paired	2.726691656	15	0.640614528	0.201096497
3404	s3404	404	0.4	4	1	3	41.6		22	6	1	timepoint		paired	2.919560941	17	0.673111687	0.635350035
3405	s3405	405	0.4	4	2	3	41.6		17.5	6	1	timepoint		paired	2.589391391	15	0.528772889	1.083941543
3406	s3406	406	0.4	4	3	3	41.6		22.8	6	1	timepoint		paired	2.685114725	21	0.625494168	0.795078002
3407	s3407	407	0.4	4	4	3	41.6		22.6	6	1	timepoint		paired	2.730797799	22	0.748334508	0.603388069
3408	s3408	408	0.4	16	1	3	41.6		8.94	6	1	timepoint		paired
3409	s3409	409	0.4	16	2	3	41.6		9.2	6	1	timepoint		paired	2.731336669	14	-0.037878937	0.458980456
3410	s3410	410	0.4	16	3	3	41.6		12.2	6	1	timepoint		paired	1.937521707	16	-0.541021169	0.384152779
3411	s3411	411	0.4	16	4	3	41.6		17.4	6	1	timepoint		paired	2.493698538	14	0.267160335	0.845250239
3412	s3412	412	0.4	600	1	3	41.6		9.44	6	1	timepoint		paired	1.162949536	11	-0.770886636	0.213713051
3413	s3413	413	0.4	600	2	3	41.6		8.64	6	1	timepoint		paired	1.295140922	16	-0.903879141	0.071950071
3414	s3414	414	0.4	600	3	3	41.6		11.7	6	1	timepoint		paired	1.39086467	16	-0.66751666	0.415881235
3415	s3415	415	0.4	600	4	3	41.6		9.48	6	1	timepoint		paired	1.913356558	19	-0.587254368	0.216672016
R3500	s3500	500	0.3	1	1	3	31.1625		13.2	9	2	timepoint		single
R3501	s3501	501	0.3	1	2	3	31.1625		12.3	9	2	timepoint		single
R3502	s3502	502	0.3	1	3	3	31.1625		16.6	9	2	timepoint		single
R3503	s3503	503	0.3	1	4	3	31.1625		13.6	9	2	timepoint		single
R3504	s3504	504	0.6	1	1	3	62.325		13.9	9	2	timepoint		single
R3505	s3505	505	0.6	1	2	3	62.325		16.4	9	2	timepoint		single	5.769053411	63	0.099520671	-0.639281339
R3506	s3506	506	0.6	1	3	3	62.325		12.3	9	2	timepoint		single
R3507	s3507	507	0.6	1	4	3	62.325		17.5	9	2	timepoint		single
R3508	s3508	508	0.9	1	1	3	93.4875		22.6	9	2	timepoint		single
R3509	s3509	509	0.9	1	2	3	93.4875		14	9	2	timepoint		single
R3510	s3510	510	0.9	1	3	3	93.4875		20.2	9	2	timepoint		single
R3511	s3511	511	0.9	1	4	3	93.4875		18.4	9	2	timepoint		single
R3512	s3512	512	1.5	1	1	3	155.8125		16.5	9	2	timepoint		single	5.416157575	51	0.460605628	0.190372348
R3513	s3513	513	1.5	1	2	3	155.8125		14.3	9	2	timepoint		single	5.200564422	46	0.596896825	0.168688968
R3514	s3514	514	1.5	1	3	3	155.8125		15.5	9	2	timepoint		single
R3515	s3515	515	1.5	1	4	3	155.8125		15.4	9	2	timepoint		single
R3606	s3606	606	0.6	4	3	3	62.325		14.5	9	2	timepoint		single
R3607	s3607	607	0.6	4	4	3	62.325		10.6	9	2	timepoint		single	5.546696292	57	0.502709759	0.312119086
R3608	s3608	608	0.9	4	1	3	93.4875		11.9	9	2	timepoint		single
R3609	s3609	609	0.9	4	2	3	93.4875		15.7	9	2	timepoint		single
R3610	s3610	610	0.9	4	3	3	93.4875		11.8	9	2	timepoint		single
R3611	s3611	611	0.9	4	4	3	93.4875		14.9	9	2	timepoint		single	5.465885758	51	0.745694598	0.405880781
R3612	s3612	612	1.5	4	1	3	155.8125		15	9	2	timepoint		single	5.40284207	49	0.745946436	0.359265146
R3613	s3613	613	1.5	4	2	3	155.8125		16.8	9	2	timepoint		single	5.438369138	51	0.832048795	0.362060087
R3614	s3614	614	1.5	4	3	3	155.8125		12.5	9	2	timepoint		single	5.579155079	57	0.853681905	0.331882457
R3615	s3615	615	1.5	4	4	3	155.8125		19.2	9	2	timepoint		single	5.302731079	50	0.690048562	0.202209188
R3700	s3700	700	0.3	600	1	3	31.1625		5.88	9	2	timepoint		single
R3701	s3701	701	0.3	600	2	3	31.1625		5.87	9	2	timepoint		single
R3702	s3702	702	0.3	600	3	3	31.1625		6.96	9	2	timepoint		single
R3703	s3703	703	0.3	600	4	3	31.1625		5.76	9	2	timepoint		single
R3704	s3704	704	0.6	600	1	3	62.325		11.4	9	2	timepoint		single
R3705	s3705	705	0.6	600	2	3	62.325		8.23	9	2	timepoint		single	5.321174882	52	0.733991601	0.32428398
R3706	s3706	706	0.6	600	3	3	62.325		8.15	9	2	timepoint		single
R3707	s3707	707	0.6	600	4	3	62.325		10.4	9	2	timepoint		single	5.117616506	44	0.126015271	-0.330575505
R3708	s3708	708	0.9	600	1	3	93.4875		8.03	9	2	timepoint		single
R3709	s3709	709	0.9	600	2	3	93.4875		6.02	9	2	timepoint		single	5.240937445	49	0.287889214	-0.255992989
R3710	s3710	710	0.9	600	3	3	93.4875		9.13	9	2	timepoint		single
R3711	s3711	711	0.9	600	4	3	93.4875		9.75	9	2	timepoint		single
R3712	s3712	712	1.5	600	1	3	155.8125		7.71	9	2	timepoint		single
R3713	s3713	713	1.5	600	2	3	155.8125		6.95	9	2	timepoint		single	5.453204531	57	0.391843417	-0.480995944
R3714	s3714	714	1.5	600	3	3	155.8125		5.09	9	2	timepoint		single	5.435748416	53	0.178538825	-0.513043283
R3715	s3715	715	1.5	600	4	3	155.8125		7.68	9	2	timepoint		single	5.312522142	47	0.294608354	-0.361183796
rep4100	s4100	100	0.1	1	1	4	13.9		36.4	3	1	timepoint		paired	3.159704633	22	0.451742411	-0.230026808
4101	s4101	101	0.1	1	2	4	13.9		32	3	1	timepoint		paired	3.103898085	24	0.102975597	0.117983242
4102	s4102	102	0.1	1	3	4	13.9		33.6	3	1	timepoint		paired	3.248110383	23	0.133870138	0.176001543
4103	s4103	103	0.1	1	4	4	13.9		37.8	3	1	timepoint		paired	2.971162254	20	-0.00011987	0.210169066
4104	s4104	104	0.1	4	1	4	13.9		48.2	3	1	timepoint		paired	2.245376926	21	0.343907974	0.894514881
4105	s4105	105	0.1	4	2	4	13.9		13.4	3	1	timepoint		paired	1.362508528	19	-0.489927687	0.664347224
4106	s4106	106	0.1	4	3	4	13.9		21.6	3	1	timepoint		paired	1.969004526	19	0.165076339	0.961677755
4107	s4107	107	0.1	4	4	4	13.9		29.8	3	1	timepoint		paired	1.520372686	15	-0.109502544	0.96094378
rep4108	s4108	108	0.1	16	1	4	13.9		22.6	3	1	timepoint		paired	0.362617945	7	0.106534783	-0.241029914
4109	s4109	109	0.1	16	2	4	13.9		19.8	3	1	timepoint		paired	0.584268829	14	-1.003974753	0.126110133
4110	s4110	110	0.1	16	3	4	13.9		12	3	1	timepoint		paired	2.038416842	16	-0.155518314	0.727529369
4111	s4111	111	0.1	16	4	4	13.9		24.6	3	1	timepoint		paired	1.030664007	16	-0.857794509	0.236391957
4112	s4112	112	0.1	600	1	4	13.9		18	3	1	timepoint		paired	0.928492518	13	-0.949752922	0.053258543
4114	s4114	114	0.1	600	3	4	13.9		20	3	1	timepoint		paired	0.965613628	16	-0.859961954	0.229377711
4115	s4115	115	0.1	600	4	4	13.9		9.28	3	1	timepoint		paired	0.945398259	16	-0.89565467	0.169574143
4200	s4200	200	0.2	1	1	4	27.7		35.6	3	1	timepoint		paired	3.040587709	14	0.102103805	-0.151646356
4201	s4201	201	0.2	1	2	4	27.7		29.8	3	1	timepoint		paired	3.033872347	14	0.256855689	0.221835138
4202	s4202	202	0.2	1	3	4	27.7		42.4	3	1	timepoint		paired	3.214816045	18	0.336591817	0.295296797
4203	s4203	203	0.2	1	4	4	27.7		34	3	1	timepoint		paired	3.091544417	17	0.18733609	-0.043289811
4204	s4204	204	0.2	4	1	4	27.7		24.8	3	1	timepoint		paired	0.818505286	16	-0.862855617	0.296471582
4205	s4205	205	0.2	4	2	4	27.7		26.2	3	1	timepoint		paired	1.075977777	12	-0.766178146	0.276254442
4206	s4206	206	0.2	4	3	4	27.7		25	3	1	timepoint		paired	0.574025186	10	-0.967575163	0.178307716
4207	s4207	207	0.2	4	4	4	27.7		25.4	3	1	timepoint		paired	0.808709885	8	-0.812914828	0.342326242
4208	s4208	208	0.2	16	1	4	27.7		17.3	3	1	timepoint		paired	0.014194229	3	-1.134008732	0.067101421
4209	s4209	209	0.2	16	2	4	27.7		11.9	3	1	timepoint		paired	0.083592515	7	-1.124246641	0.067330602
4210	s4210	210	0.2	16	3	4	27.7		17.4	3	1	timepoint		paired	0.044626764	6	-1.128098413	0.066917367
4211	s4211	211	0.2	16	4	4	27.7		18.3	3	1	timepoint		paired	0.039656029	6	-1.128682513	0.067093937
4212	s4212	212	0.2	600	1	4	27.7		13.7	3	1	timepoint		paired	0.038693862	9	-1.132937708	0.066908032
4213	s4213	213	0.2	600	2	4	27.7		11.1	3	1	timepoint		paired	0.029686487	5	-1.13219462	0.067106142
4214	s4214	214	0.2	600	3	4	27.7		10.9	3	1	timepoint		paired	0.334899284	11	-1.090327389	0.03617758
4215	s4215	215	0.2	600	4	4	27.7		21.4	3	1	timepoint		paired	0.007124008	2	-1.134863955	0.067286704
4300	s4300	300	0.3	1	1	4	41.6		42.4	4	1	timepoint		paired	3.08093523	20	0.721597804	0.230535372
4301	s4301	301	0.3	1	2	4	41.6		32.4	4	1	timepoint		paired	2.716075881	18	0.555651932	0.300901843
4302	s4302	302	0.3	1	3	4	41.6		46.4	4	1	timepoint		paired	2.936792329	17	0.478319979	0.152796813
4303	s4303	303	0.3	1	4	4	41.6		36	4	1	timepoint		paired	3.177523808	18	0.733573143	0.244569216
4304	s4304	304	0.3	4	1	4	41.6		36.8	4	1	timepoint		paired	1.973881533	17	0.314760112	0.957637865
4305	s4305	305	0.3	4	2	4	41.6		24	4	1	timepoint		paired	0.373406497	10	-1.046360063	0.113864236
4306	s4306	306	0.3	4	3	4	41.6		40.4	4	1	timepoint		paired	1.673117573	12	0.132087368	1.075033131
4307	s4307	307	0.3	4	4	4	41.6		38	4	1	timepoint		paired	1.354462956	9	0.061963854	1.090934149
rep4308	s4308	308	0.3	16	1	4	41.6		19.3	4	1	timepoint		paired
4309	s4309	309	0.3	16	2	4	41.6		13.9	4	1	timepoint		paired	0.387152627	11	-1.070256996	0.050769058
4310	s4310	310	0.3	16	3	4	41.6		11.5	4	1	timepoint		paired	0.340004687	13	-1.091520091	0.069135006
4311	s4311	311	0.3	16	4	4	41.6		13.9	4	1	timepoint		paired	0.606475374	9	-1.010573266	0.026304494
4312	s4312	312	0.3	600	1	4	41.6		9.02	4	1	timepoint		paired	0.219815327	15	-1.128046504	0.079699125
4313	s4313	313	0.3	600	2	4	41.6		13.7	4	1	timepoint		paired	1.627812908	10	-0.572645326	-0.056012017
4314	s4314	314	0.3	600	3	4	41.6		10.6	4	1	timepoint		paired	1.895239669	14	-0.748449265	0.038103792
4315	s4315	315	0.3	600	4	4	41.6		12.3	4	1	timepoint		paired	0.022274028	4	-1.131117386	0.067307326
4400	s4400	400	0.4	1	1	4	55.4		33	4	1	timepoint		paired	2.623284472	18	0.406133548	0.550249936
4401	s4401	401	0.4	1	2	4	55.4		22.8	4	1	timepoint		paired	2.814125368	21	0.687298	0.277013735
4402	s4402	402	0.4	1	3	4	55.4		29	4	1	timepoint		paired	2.709105062	23	0.453489755	0.300116108
4403	s4403	403	0.4	1	4	4	55.4		36.8	4	1	timepoint		paired	2.497645037	14	0.41154645	0.356700782
4404	s4404	404	0.4	4	1	4	55.4		25.8	4	1	timepoint		paired	2.7336141	19	0.511809741	0.671449216
4405	s4405	405	0.4	4	2	4	55.4		23.2	4	1	timepoint		paired	2.059065486	11	0.136862937	1.043519987
4406	s4406	406	0.4	4	3	4	55.4		37	4	1	timepoint		paired	2.534977583	21	0.601009094	0.721563925
4407	s4407	407	0.4	4	4	4	55.4		27.6	4	1	timepoint		paired	2.569581345	25	0.75237731	0.620920388
4408	s4408	408	0.4	16	1	4	55.4		10.9	4	1	timepoint		paired	0.522938734	9	-1.018757826	0.025148675
4409	s4409	409	0.4	16	2	4	55.4		9.5	4	1	timepoint		paired	1.662548443	16	-0.702453188	-0.015387513
4410	s4410	410	0.4	16	3	4	55.4		12.8	4	1	timepoint		paired	1.189305836	17	-0.860368487	0.09468804
4411	s4411	411	0.4	16	4	4	55.4		12	4	1	timepoint		paired	0.707929377	12	-0.917241215	0.22286026
4412	s4412	412	0.4	600	1	4	55.4		8.2	4	1	timepoint		paired	0.935615326	16	-0.85786543	-0.079659097
4413	s4413	413	0.4	600	2	4	55.4		7.86	4	1	timepoint		paired	1.050176055	18	-0.958401844	0.030352986
4414	s4414	414	0.4	600	3	4	55.4		11.3	4	1	timepoint		paired	0.622200832	17	-0.957717556	-0.020577696
4415	s4415	415	0.4	600	4	4	55.4		10.6	4	1	timepoint		paired	0.562605648	11	-0.991053828	0.021746621
4500	s4500	500	0.3	1	1	4	41.55		15.6	8	2	timepoint		single	2.897254781	19	0.756328766	0.274598546
4501	s4501	501	0.3	1	2	4	41.55		13.8	8	2	timepoint		single	3.072844354	20	0.727693099	0.305757123
4502	s4502	502	0.3	1	3	4	41.55		22.1	8	2	timepoint		single	2.853414252	17	0.396488999	0.46187886
4503	s4503	503	0.3	1	4	4	41.55		18.4	8	2	timepoint		single	3.054480755	20	0.568349623	0.191035604
4504	s4504	504	0.6	1	1	4	83.1		15.9	8	2	timepoint		single	2.755946805	20	0.779662484	0.287811759
4505	s4505	505	0.6	1	2	4	83.1		17.5	8	2	timepoint		single	2.926973105	24	0.638392886	0.496120036
4506	s4506	506	0.6	1	3	4	83.1		23	8	2	timepoint		single	2.898984719	17	0.508845514	0.189952145
4507	s4507	507	0.6	1	4	4	83.1		17	8	2	timepoint		single	3.037375858	24	0.727620064	0.317681619
4508	s4508	508	0.9	1	1	4	124.65		14.8	8	2	timepoint		single	3.052717376	21	0.666256923	0.325844425
4509	s4509	509	0.9	1	2	4	124.65		21.7	8	2	timepoint		single	3.041184202	20	0.653061447	0.328297853
4510	s4510	510	0.9	1	3	4	124.65		20.6	8	2	timepoint		single	2.664088993	20	0.589880594	0.345821731
4511	s4511	511	0.9	1	4	4	124.65		23.6	8	2	timepoint		single	2.848622034	19	0.643028572	0.299002875
4512	s4512	512	1.5	1	1	4	207.75		18	8	2	timepoint		single	3.088375286	22	0.56481895	0.206895375
4513	s4513	513	1.5	1	2	4	207.75		25.1	8	2	timepoint		single	2.6915286	18	0.37872672	0.356866568
4514	s4514	514	1.5	1	3	4	207.75		19	8	2	timepoint		single	3.025034697	20	0.678901783	0.189209923
4515	s4515	515	1.5	1	4	4	207.75		15.4	8	2	timepoint		single	3.230787343	23	0.678553846	0.192734479
4606	s4606	606	0.6	4	3	4	83.1		17.1	8	2	timepoint		single	3.313765026	30	0.828839135	0.46777352
4607	s4607	607	0.6	4	4	4	83.1		25.5	8	2	timepoint		single	3.156424945	26	0.939751778	0.460665351
4608	s4608	608	0.9	4	1	4	124.65		14.4	8	2	timepoint		single	3.143488212	30	0.925397222	0.461123637
4609	s4609	609	0.9	4	2	4	124.65		14.5	8	2	timepoint		single	3.222236394	29	0.873386137	0.314847086
4610	s4610	610	0.9	4	3	4	124.65		22.4	8	2	timepoint		single	3.369083267	31	0.869835312	0.28515925
4611	s4611	611	0.9	4	4	4	124.65		18.6	8	2	timepoint		single	3.035401509	26	0.960804132	0.429889461
4612	s4612	612	1.5	4	1	4	207.75		15.2	8	2	timepoint		single	3.006306179	27	0.954925494	0.461424474
4613	s4613	613	1.5	4	2	4	207.75		12.5	8	2	timepoint		single	3.179783459	31	0.927564398	0.31993473
4614	s4614	614	1.5	4	3	4	207.75		23.5	8	2	timepoint		single	3.298681743	28	0.780842023	0.182209202
4615	s4615	615	1.5	4	4	4	207.75		18.9	8	2	timepoint		single	3.07133548	33	0.945763845	0.459620664
4700	s4700	700	0.3	600	1	4	41.55		6	8	2	timepoint		single	0.465864888	8	-1.019537024	0.02832195
4701	s4701	701	0.3	600	2	4	41.55		8.2	8	2	timepoint		single	0.850592914	10	-0.95102346	0.005008297
4702	s4702	702	0.3	600	3	4	41.55		7.08	8	2	timepoint		single	0.104399256	7	-1.116880626	0.065209675
4703	s4703	703	0.3	600	4	4	41.55		4.74	8	2	timepoint		single	0.469570996	9	-1.028310913	0.031606821
4704	s4704	704	0.6	600	1	4	83.1		9.18	8	2	timepoint		single	2.44077485	22	0.052099368	-0.379993234
4705	s4705	705	0.6	600	2	4	83.1		9.84	8	2	timepoint		single	2.67444436	24	0.125877545	-0.244033501
4706	s4706	706	0.6	600	3	4	83.1		8.32	8	2	timepoint		single	2.780364753	26	0.278063546	-0.348532699
4707	s4707	707	0.6	600	4	4	83.1		10.5	8	2	timepoint		single	2.592587797	25	0.257561437	-0.239047965
4708	s4708	708	0.9	600	1	4	124.65		7.49	8	2	timepoint		single	2.98972379	27	0.305328994	-0.472764599
4709	s4709	709	0.9	600	2	4	124.65		7.76	8	2	timepoint		single	3.139046546	32	0.395839699	-0.463073884
4710	s4710	710	0.9	600	3	4	124.65		7.03	8	2	timepoint		single	3.33415926	28	0.379013956	-0.326772992
4711	s4711	711	0.9	600	4	4	124.65		9.23	8	2	timepoint		single	3.281504588	21	0.443918394	-0.182949789
4712	s4712	712	1.5	600	1	4	207.75		5.81	8	2	timepoint		single	3.259000278	26	0.422845189	-0.22897941
4713	s4713	713	1.5	600	2	4	207.75		7.21	8	2	timepoint		single	3.131071755	29	0.349626563	-0.303540094
4714	s4714	714	1.5	600	3	4	207.75		6.12	8	2	timepoint		single	3.308159474	29	0.401414724	-0.230137814
4715	s4715	715	1.5	600	4	4	207.75		5.02	8	2	timepoint		single	3.205461773	29	0.558815927	-0.186618844
5100	s5100	100	0.1	1	1	5	17.3		49.6	6	1	timepoint		paired	2.730722914	19	0.694938273	0.593203126
5101	s5101	101	0.1	1	2	5	17.3		34.8	6	1	timepoint		paired	2.479521776	19	0.544165897	0.702508431
5102	s5102	102	0.1	1	3	5	17.3		50.8	6	1	timepoint		paired	2.576350364	18	0.333004804	0.790337361
5103	s5103	103	0.1	1	4	5	17.3		48.8	6	1	timepoint		paired	2.52912402	21	0.495466039	0.815775545
5104	s5104	104	0.1	4	1	5	17.3		87	6	1	timepoint		paired	1.135292486	12	0.480506885	1.153454057
5105	s5105	105	0.1	4	2	5	17.3		41.8	6	1	timepoint		paired	1.45892333	11	-0.400155599	0.749491969
5106	s5106	106	0.1	4	3	5	17.3		53.2	6	1	timepoint		paired	1.181006537	14	0.371998151	1.140934652
5107	s5107	107	0.1	4	4	5	17.3		52.8	6	1	timepoint		paired	1.053168277	11	0.360666408	1.159878286
5108	s5108	108	0.1	16	1	5	17.3		21.8	6	1	timepoint		paired
5109	s5109	109	0.1	16	2	5	17.3		32	6	1	timepoint		paired	0.841765163	6	-0.714933646	0.478827529
5110	s5110	110	0.1	16	3	5	17.3		34	6	1	timepoint		paired	1.408157748	13	0.222045382	1.070536583
5111	s5111	111	0.1	16	4	5	17.3		21.4	6	1	timepoint		paired	1.247238715	14	-0.843691898	0.278248388
5112	s5112	112	0.1	600	1	5	17.3		22.8	6	1	timepoint		paired	1.308151336	10	-0.808197401	-0.047203115
5114	s5114	114	0.1	600	3	5	17.3		24.4	6	1	timepoint		paired	0.338967895	9	-1.058942522	0.09442922
5115	s5115	115	0.1	600	4	5	17.3		17.1	6	1	timepoint		paired	0.310350859	11	-1.070229151	0.084920068
5200	s5200	200	0.2	1	1	5	34.6		28.8	6	1	timepoint		paired	3.163161479	21	0.579449113	0.269549623
5201	s5201	201	0.2	1	2	5	34.6		47.2	6	1	timepoint		paired	2.771138979	13	0.566638539	0.291733022
5202	s5202	202	0.2	1	3	5	34.6		58	6	1	timepoint		paired	3.064543465	16	0.516750246	0.109556247
5204	s5204	204	0.2	4	1	5	34.6		36.2	6	1	timepoint		paired	0.603069851	9	-0.951955471	0.192250268
5205	s5205	205	0.2	4	2	5	34.6		23.8	6	1	timepoint		paired	0.877087542	11	-0.899776288	0.013442765
5206	s5206	206	0.2	4	3	5	34.6		20.2	6	1	timepoint		paired	1.007354628	20	-1.062106795	0.093602387
5207	s5207	207	0.2	4	4	5	34.6		23.4	6	1	timepoint		paired	1.028043714	12	-0.856782097	0.212595427
5208	s5208	208	0.2	16	1	5	34.6		14.3	6	1	timepoint		paired
5209	s5209	209	0.2	16	2	5	34.6		15.3	6	1	timepoint		paired	0.068421572	5	-1.126848647	0.067715926
5210	s5210	210	0.2	16	3	5	34.6		18.2	6	1	timepoint		paired	0.057144343	7	-1.12939435	0.067211435
5211	s5211	211	0.2	16	4	5	34.6		12.4	6	1	timepoint		paired	0.0228626	4	-1.131354808	0.067251006
5212	s5212	212	0.2	600	1	5	34.6		15.4	6	1	timepoint		paired	0.017242795	2	-1.131858402	0.067429217
5213	s5213	213	0.2	600	2	5	34.6		11.3	6	1	timepoint		paired	0.014721954	4	-1.133621915	0.067270365
5214	s5214	214	0.2	600	3	5	34.6		13.3	6	1	timepoint		paired	0.444525716	5	-0.994984659	-0.034853077
5215	s5215	215	0.2	600	4	5	34.6		18.2	6	1	timepoint		paired	0.026438427	4	-1.131062115	0.067405206
5300	s5300	300	0.3	1	1	5	51.9		42.4	6	1	timepoint		paired	2.398293755	15	0.920693068	0.811463268
5301	s5301	301	0.3	1	2	5	51.9		28.2	6	1	timepoint		paired	2.58695301	19	0.77747221	0.372147877
5302	s5302	302	0.3	1	3	5	51.9		29.8	6	1	timepoint		paired	2.245286913	16	0.651997251	0.063845086
5303	s5303	303	0.3	1	4	5	51.9		28.4	6	1	timepoint		paired	2.49904346	14	0.923487884	0.778967242
5304	s5304	304	0.3	4	1	5	51.9		31.8	6	1	timepoint		paired	1.360427045	16	0.65897539	1.077592538
5305	s5305	305	0.3	4	2	5	51.9		18	6	1	timepoint		paired	1.063549648	12	-0.840806151	0.260132173
5306	s5306	306	0.3	4	3	5	51.9		35	6	1	timepoint		paired	1.024961073	11	0.583484967	1.175352488
5307	s5307	307	0.3	4	4	5	51.9		29.6	6	1	timepoint		paired	1.008873228	9	0.502660307	1.198226112
5308	s5308	308	0.3	16	1	5	51.9		13	6	1	timepoint		paired	0.373775127	4	-1.08744676	0.072654812
5309	s5309	309	0.3	16	2	5	51.9		9.9	6	1	timepoint		paired	0.956595638	9	-0.912849432	0.003026313
5310	s5310	310	0.3	16	3	5	51.9		9.02	6	1	timepoint		paired	0.477817318	9	-1.062890686	0.061292494
5311	s5311	311	0.3	16	4	5	51.9		10.6	6	1	timepoint		paired	1.060973013	8	-0.809711331	-0.038214703
5312	s5312	312	0.3	600	1	5	51.9		13.3	6	1	timepoint		paired	0.218050797	9	-1.109401446	0.083363364
5313	s5313	313	0.3	600	2	5	51.9		12.5	6	1	timepoint		paired	1.674549633	10	-0.436554501	-0.165966161
5314	s5314	314	0.3	600	3	5	51.9		11.5	6	1	timepoint		paired	1.877346135	17	-0.703583497	-0.012812636
5315	s5315	315	0.3	600	4	5	51.9		12.1	6	1	timepoint		paired	0.072778661	5	-1.120020036	0.067986647
5400	s5400	400	0.4	1	1	5	69.3		35	6	1	timepoint		paired	2.237073239	9	0.860020817	0.994792007
5401	s5401	401	0.4	1	2	5	69.3		31.6	6	1	timepoint		paired	2.835153433	17	0.840462332	0.449554061
5402	s5402	402	0.4	1	3	5	69.3		42.4	6	1	timepoint		paired	2.64133377	20	0.694836766	0.177785331
5403	s5403	403	0.4	1	4	5	69.3		29.2	6	1	timepoint		paired	2.373801158	16	0.829243478	0.426785128
5404	s5404	404	0.4	4	1	5	69.3		35.2	6	1	timepoint		paired	1.932575221	17	0.770861239	0.886455713
5405	s5405	405	0.4	4	2	5	69.3		35.2	6	1	timepoint		paired	1.554990477	9	0.439100109	1.171357702
5406	s5406	406	0.4	4	3	5	69.3		30.2	6	1	timepoint		paired	1.877816148	18	0.67899821	0.933105221
5407	s5407	407	0.4	4	4	5	69.3		24.8	6	1	timepoint		paired	2.336807966	23	0.815708582	0.612078521
5408	s5408	408	0.4	16	1	5	69.3		7.16	6	1	timepoint		paired
5409	s5409	409	0.4	16	2	5	69.3		7.68	6	1	timepoint		paired	2.54024289	16	0.010660595	-0.047713873
5410	s5410	410	0.4	16	3	5	69.3		6.14	6	1	timepoint		paired	2.122866231	18	-0.51983575	-0.111573816
5411	s5411	411	0.4	16	4	5	69.3		8.04	6	1	timepoint		paired	1.296686104	14	-0.89592811	0.2093997
5412	s5412	412	0.4	600	1	5	69.3		4.14	6	1	timepoint		paired	1.077607436	8	-0.703535327	-0.195406011
5413	s5413	413	0.4	600	2	5	69.3		8.4	6	1	timepoint		paired	1.215249113	12	-0.930195513	0.024614655
5414	s5414	414	0.4	600	3	5	69.3		11	6	1	timepoint		paired	0.913042934	11	-0.862872316	-0.201392004
5415	s5415	415	0.4	600	4	5	69.3		5.16	6	1	timepoint		paired	1.281979768	15	-0.790917007	-0.044594721
R5500	s5500	500	0.3	1	1	5	51.9375		20.1	10	2	timepoint		single
R5501	s5501	501	0.3	1	2	5	51.9375		22.2	10	2	timepoint		single	5.879407642	77	0.305686786	-0.40920071
R5502	s5502	502	0.3	1	3	5	51.9375		28.1	10	2	timepoint		single	5.61084703	57	0.67257412	0.536432599
R5503	s5503	503	0.3	1	4	5	51.9375		20.4	10	2	timepoint		single	5.567744224	55	0.578971575	0.686518314
R5504	s5504	504	0.6	1	1	5	103.875		17.5	10	2	timepoint		single	5.63546221	60	0.541217431	0.493196005
R5505	s5505	505	0.6	1	2	5	103.875		21.6	10	2	timepoint		single	5.472505983	52	0.688718246	0.472096068
R5506	s5506	506	0.6	1	3	5	103.875		22	10	2	timepoint		single	5.673064828	61	0.504643262	0.725124336
R5507	s5507	507	0.6	1	4	5	103.875		17.6	10	2	timepoint		single	5.474051616	53	0.562587483	0.371220442
R5508	s5508	508	0.9	1	1	5	155.8125		24.4	10	2	timepoint		single
R5509	s5509	509	0.9	1	2	5	155.8125		20.6	10	2	timepoint		single
R5510	s5510	510	0.9	1	3	5	155.8125		26.1	10	2	timepoint		single
R5511	s5511	511	0.9	1	4	5	155.8125		19.8	10	2	timepoint		single
R5512	s5512	512	1.5	1	1	5	259.6875		25.8	10	2	timepoint		single
R5513	s5513	513	1.5	1	2	5	259.6875		17.7	10	2	timepoint		single
R5514	s5514	514	1.5	1	3	5	259.6875		30.6	10	2	timepoint		single
R5515	s5515	515	1.5	1	4	5	259.6875		20.5	10	2	timepoint		single
R5606	s5606	606	0.6	4	3	5	103.875		18.4	10	2	timepoint		single
R5607	s5607	607	0.6	4	4	5	103.875		11.8	10	2	timepoint		single
R5608	s5608	608	0.9	4	1	5	155.8125		19.6	10	2	timepoint		single
R5609	s5609	609	0.9	4	2	5	155.8125		20.6	10	2	timepoint		single	5.620654881	57	0.701316341	0.513261613
R5610	s5610	610	0.9	4	3	5	155.8125		18.4	10	2	timepoint		single	5.642768835	58	0.850251523	0.379082076
R5611	s5611	611	0.9	4	4	5	155.8125		18.6	10	2	timepoint		single
R5612	s5612	612	1.5	4	1	5	259.6875		15.5	10	2	timepoint		single
R5613	s5613	613	1.5	4	2	5	259.6875		16.6	10	2	timepoint		single	5.72817374	60	0.761823031	0.256177676
R5614	s5614	614	1.5	4	3	5	259.6875		14.9	10	2	timepoint		single
R5615	s5615	615	1.5	4	4	5	259.6875		14.9	10	2	timepoint		single
R5700	s5700	700	0.3	600	1	5	51.9375		7.82	10	2	timepoint		single
R5701	s5701	701	0.3	600	2	5	51.9375		7.54	10	2	timepoint		single
R5702	s5702	702	0.3	600	3	5	51.9375		5.82	10	2	timepoint		single
R5703	s5703	703	0.3	600	4	5	51.9375		5	10	2	timepoint		single
R5704	s5704	704	0.6	600	1	5	103.875		11	10	2	timepoint		single
R5705	s5705	705	0.6	600	2	5	103.875		9.66	10	2	timepoint		single	5.615626375	56	0.819793753	0.337041375
R5706	s5706	706	0.6	600	3	5	103.875		9.24	10	2	timepoint		single	5.455440984	52	0.348987941	0.047943823
R5707	s5707	707	0.6	600	4	5	103.875		9.62	10	2	timepoint		single	5.465878007	56	0.274545199	-0.223950577
R5708	s5708	708	0.9	600	1	5	155.8125		7.15	10	2	timepoint		single
R5709	s5709	709	0.9	600	2	5	155.8125		6.53	10	2	timepoint		single	5.585048021	55	0.490927278	-0.037236753
R5710	s5710	710	0.9	600	3	5	155.8125		8.71	10	2	timepoint		single	5.96312871	69	0.500826245	-0.243888636
R5711	s5711	711	0.9	600	4	5	155.8125		9.48	10	2	timepoint		single	5.91580442	70	0.429767946	-0.114961269
R5712	s5712	712	1.5	600	1	5	259.6875		7.62	10	2	timepoint		single
R5713	s5713	713	1.5	600	2	5	259.6875		7.21	10	2	timepoint		single	5.869324684	70	0.463202175	-0.000817571
R5714	s5714	714	1.5	600	3	5	259.6875		7.85	10	2	timepoint		single	5.542237113	55	0.38415895	-0.197478268
R5715	s5715	715	1.5	600	4	5	259.6875		7.77	10	2	timepoint		single
6100	s6100	100	0.1	1	1	6	20.8		36.6	4	1	timepoint		paired	2.712097995	20	0.411541521	0.598154242	8
6101	s6101	101	0.1	1	2	6	20.8		33	4	1	timepoint		paired	2.332722706	21	0.149124002	0.804353916	7
6102	s6102	102	0.1	1	3	6	20.8		39	4	1	timepoint		paired	2.223961	18	0.058349195	0.875698077	7
6103	s6103	103	0.1	1	4	6	20.8		36.2	4	1	timepoint		paired	2.144786885	16	0.098403998	0.887574972	7
6104	s6104	104	0.1	4	1	6	20.8		51.2	4	1	timepoint		paired	1.38587973	16	0.069241244	1.080345378	3
6105	s6105	105	0.1	4	2	6	20.8		23.6	4	1	timepoint		paired	1.224110867	10	-0.586726112	0.58539585	3
6106	s6106	106	0.1	4	3	6	20.8		42.2	4	1	timepoint		paired	1.228517922	10	-0.102172216	1.028447634	3
6107	s6107	107	0.1	4	4	6	20.8		38.6	4	1	timepoint		paired	1.15879505	7	0.060205141	1.109240231	3
6108	s6108	108	0.1	16	1	6	20.8		20.4	4	1	timepoint		paired	0.045179081	4	-1.126941604	0.067313353	1
6109	s6109	109	0.1	16	2	6	20.8		18	4	1	timepoint		paired	0.993703379	12	-0.692414964	0.498084556	3
6110	s6110	110	0.1	16	3	6	20.8		24.6	4	1	timepoint		paired	1.350107486	11	-0.023038054	1.005137973	4
6111	s6111	111	0.1	16	4	6	20.8		15.1	4	1	timepoint		paired	0.286645918	8	-1.102786072	0.078191584	2
6112	s6112	112	0.1	600	1	6	20.8		19	4	1	timepoint		paired	1.271313302	9	-0.825148778	-0.047622373	2
6114	s6114	114	0.1	600	3	6	20.8		17.1	4	1	timepoint		paired	0.068372989	8	-1.121304202	0.067709174	1
6115	s6115	115	0.1	600	4	6	20.8		13.6	4	1	timepoint		paired	0.082062294	7	-1.117671857	0.070103177	3
rep6200	s6200	200	0.2	1	1	6	41.6	0.029045593	25.2	4	1	timepoint		paired	2.967543853	15	-1.041489258	0.11452409	8
6201	s6201	201	0.2	1	2	6	41.6	0.025433506	26	4	1	timepoint		paired	2.692740708	14	0.451902305	0.30599484	8
6202	s6202	202	0.2	1	3	6	41.6	0.032154433	35.6	4	1	timepoint		paired	2.667872187	17	0.507753334	0.507792862	9
6203	s6203	203	0.2	1	4	6	41.6	0.03108007	39.4	4	1	timepoint		paired	2.96158729	23	0.489180931	0.297727845	8
6204	s6204	204	0.2	4	1	6	41.6	0.042902107	21.8	4	1	timepoint		paired	0.970414163	14	-0.811365621	0.319298791	2
6205	s6205	205	0.2	4	2	6	41.6	0.029177637	12.1	4	1	timepoint		paired	1.057232028	11	-0.830137339	0.141840371	3
6206	s6206	206	0.2	4	3	6	41.6	0.036609052	15.1	4	1	timepoint		paired	0.522806973	4	-1.058113226	0.076343243	3
6207	s6207	207	0.2	4	4	6	41.6	0.037742801	18.8	4	1	timepoint		paired	0.900066653	10	-0.932440284	0.161599802	2
rep6208	s6208	208	0.2	16	1	6	41.6	0.028566398	20.6	4	1	timepoint		paired	0	1	-0.015949203	0.150745425	1
6209	s6209	209	0.2	16	2	6	41.6	0.045276488	17.8	4	1	timepoint		paired	0.076411179	4	-1.125830376	0.067817108	1
6210	s6210	210	0.2	16	3	6	41.6	0.062009033	21.4	4	1	timepoint		paired	0.025295936	6	-1.132698887	0.067307938	1
6211	s6211	211	0.2	16	4	6	41.6	0.071160689	15.5	4	1	timepoint		paired	0.015697233	3	-1.134063736	0.067378579	2
6212	s6212	212	0.2	600	1	6	41.6	0.111308725	20.8	4	1	timepoint		paired	0.042077573	5	-1.132849988	0.067523192	2
6213	s6213	213	0.2	600	2	6	41.6	0.128383077	9.82	4	1	timepoint		paired	0.013233519	4	-1.13407276	0.067293054	3
6214	s6214	214	0.2	600	3	6	41.6	0.082879608	16.6	4	1	timepoint		paired	0.670517218	7	-0.902063232	-0.14851044	1
6215	s6215	215	0.2	600	4	6	41.6	0.068296576	15.7	4	1	timepoint		paired	0	1	-1.135996623	0.067474335	2
6300	s6300	300	0.3	1	1	6	62.3	0.027940768	53.4	4	1	timepoint		paired	2.607982858	22	0.857510906	0.688030318	10
6301	s6301	301	0.3	1	2	6	62.3	0.048322271	45	4	1	timepoint		paired	2.450542093	22	0.814016804	0.524981465	8
6302	s6302	302	0.3	1	3	6	62.3	0.031178012	36.4	4	1	timepoint		paired	2.708194418	25	0.438559451	0.440934494	10
6303	s6303	303	0.3	1	4	6	62.3	0.016739677	42.8	4	1	timepoint		paired	2.686361861	18	0.852738162	0.663548514	10
6304	s6304	304	0.3	4	1	6	62.3	0.041882763	38.2	4	1	timepoint		paired	1.619724373	18	0.5212677	1.000411067	5
6305	s6305	305	0.3	4	2	6	62.3	0.040825817	20.2	4	1	timepoint		paired	0.436411154	8	-1.068701493	0.070107127	2
6306	s6306	306	0.3	4	3	6	62.3	0.058379467	35.8	4	1	timepoint		paired	1.577448105	10	0.111007454	1.023663441	5
6307	s6307	307	0.3	4	4	6	62.3	0.058174199	30.2	4	1	timepoint		paired	1.257354406	11	0.035384243	1.09578938	4
6308	s6308	308	0.3	16	1	6	62.3	0.189779079	13.3	4	1	timepoint		paired	0.158175294	3	-1.113035429	0.067957152	2
6309	s6309	309	0.3	16	2	6	62.3	0.164454517	12.3	4	1	timepoint		paired	1.583270921	11	-0.667168398	0.097536085	2
6310	s6310	310	0.3	16	3	6	62.3	0.162673119	6.48	4	1	timepoint		paired	0.646649372	11	-1.015952628	0.040659875	1
6311	s6311	311	0.3	16	4	6	62.3	0.151976369	14.8	4	1	timepoint		paired	0.884985045	6	-0.896659941	-0.012343839	1
rep6312	s6312	312	0.3	600	1	6	62.3	0.295266454	11.6	4	1	timepoint		paired	0.046305897	2	-1.135996623	0.067474335	2
6313	s6313	313	0.3	600	2	6	62.3	0.251014093	12.7	4	1	timepoint		paired	0.516852477	9	-1.025733305	0.031425485	2
rep6314	s6314	314	0.3	600	3	6	62.3	0.196165247	11.6	4	1	timepoint		paired	0.689356595	8	-1.123230721	0.069110061	2
6315	s6315	315	0.3	600	4	6	62.3	0.15031398	12.8	4	1	timepoint		paired	0.005927848	3	-1.134997997	0.06743706	2
6400	s6400	400	0.4	1	1	6	83.1	0.033864809	40.8	4	1	timepoint		paired	2.211236006	18	0.750796831	0.784250017	7
6401	s6401	401	0.4	1	2	6	83.1	0.017809617	41.4	4	1	timepoint		paired	3.003841963	27	0.756237748	0.51574766	8
6402	s6402	402	0.4	1	3	6	83.1	0.01400741	30.4	4	1	timepoint		paired	2.692419492	25	0.717017903	0.308015681	7
6403	s6403	403	0.4	1	4	6	83.1	0.014421098	47.6	4	1	timepoint		paired	1.871376681	13	0.737960858	0.522892056	6
6404	s6404	404	0.4	4	1	6	83.1	0.073109132	32.8	4	1	timepoint		paired	2.407490573	22	0.657776822	0.641299321	5
6405	s6405	405	0.4	4	2	6	83.1	0.035326965	22	4	1	timepoint		paired	1.653136779	10	-0.173974392	0.924841041	4
6406	s6406	406	0.4	4	3	6	83.1	0.086237811	25.2	4	1	timepoint		paired	2.147382596	22	0.542978264	0.81521071	5
6407	s6407	407	0.4	4	4	6	83.1	0.116219474	30.8	4	1	timepoint		paired	2.547723374	23	0.724399308	0.499354412	6
6408	s6408	408	0.4	16	1	6	83.1	0.164795212	6.96	4	1	timepoint		paired	1.535699625	9	-0.595505658	-0.222107324	2
6409	s6409	409	0.4	16	2	6	83.1	0.130065146	7.62	4	1	timepoint		paired	2.602233012	21	-0.156495731	0.083760791	2
6410	s6410	410	0.4	16	3	6	83.1	0.140349348	8.9	4	1	timepoint		paired	2.187771134	18	-0.451431733	0.012815878	1
6411	s6411	411	0.4	16	4	6	83.1	0.155362641	8.08	4	1	timepoint		paired	0.524162889	7	-1.062836061	0.077297981	1
6412	s6412	412	0.4	600	1	6	83.1	0.220573081	6.9	4	1	timepoint		paired	1.049343516	11	-0.689008563	-0.185274263	2
6413	s6413	413	0.4	600	2	6	83.1	0.135069779	7.34	4	1	timepoint		paired	1.089293015	8	-0.955654561	0.024964252	1
6414	s6414	414	0.4	600	3	6	83.1	0.162769006	4.9	4	1	timepoint		paired	0.858295597	8	-0.829802121	-0.207947317	2
6415	s6415	415	0.4	600	4	6	83.1	0.131329368	6.7	4	1	timepoint		paired	1.03952847	9	-0.838347339	-0.063165366	2
6500	s6500	500	0.3	1	1	6	62.325	0.035	18.9	8	2	timepoint		paired	2.955645907	22	0.862235263	0.476913673	8
6501	s6501	501	0.3	1	2	6	62.325	0.225	21.8	8	2	timepoint		paired	2.833276158	21	0.634370095	0.574817802	6
6502	s6502	502	0.3	1	3	6	62.325	0.024	22.8	8	2	timepoint		paired	2.723258663	23	0.646965533	0.685519515	7
6503	s6503	503	0.3	1	4	6	62.325	0.077	22.3	8	2	timepoint		paired	2.689723216	18	0.453008606	0.679172418	7
6504	s6504	504	0.6	1	1	6	124.65	0.14	29.8	8	2	timepoint		paired	3.005423752	25	0.849173661	0.654033469	8
6505	s6505	505	0.6	1	2	6	124.65	0.029	15.5	8	2	timepoint		paired	2.368767178	19	0.082096052	0.898224182	4
6506	s6506	506	0.6	1	3	6	124.65	0.059	23.9	8	2	timepoint		paired	2.998643028	28	0.814318596	0.585496388	7
6507	s6507	507	0.6	1	4	6	124.65	0.042	18.9	8	2	timepoint		paired	2.907684547	28	0.764813082	0.630084911	7
6508	s6508	508	0.9	1	1	6	186.975	0.014	22	8	2	timepoint		paired	2.743102945	24	0.698066574	0.733469172	7
6509	s6509	509	0.9	1	2	6	186.975	0.042	16.2	8	2	timepoint		paired	2.93239949	17	0.658069166	0.640198862	5
6510	s6510	510	0.9	1	3	6	186.975	0.024	21.5	8	2	timepoint		paired	2.631719937	19	0.366851073	0.612218341	7
6511	s6511	511	0.9	1	4	6	186.975	0.037	18.7	8	2	timepoint		paired	2.476759961	17	0.329331852	0.711293361	6
6512	s6512	512	1.5	1	1	6	311.625	0.076	15.1	8	2	timepoint		paired	3.002941191	26	0.787958985	0.393567125	6
6513	s6513	513	1.5	1	2	6	311.625	0.034	17	8	2	timepoint		paired	3.170705811	21	0.660544419	0.329612661	6
6514	s6514	514	1.5	1	3	6	311.625	0.033	31	8	2	timepoint		paired	2.687754151	22	0.782562629	0.638171595	7
6515	s6515	515	1.5	1	4	6	311.625	0.027	25.3	8	2	timepoint		paired	2.923513273	24	0.73449392	0.472220454	6
6606	s6606	606	0.6	4	3	6	124.65	0.229	11.3	8	2	timepoint		paired	3.298796116	29	0.789632766	0.377513741	7
6607	s6607	607	0.6	4	4	6	124.65	0.165	14.7	8	2	timepoint		paired	2.717951636	29	0.82463775	0.278459696	5
6608	s6608	608	0.9	4	1	6	186.975	0.197	20.9	8	2	timepoint		paired	3.266746179	34	0.74552647	0.504961434	7
6609	s6609	609	0.9	4	2	6	186.975	0.336	20.3	8	2	timepoint		paired	3.237337078	31	0.834859771	0.230537852	7
6610	s6610	610	0.9	4	3	6	186.975	0.231	14	8	2	timepoint		paired	3.485143939	37	0.77972689	0.083403996	6
6611	s6611	611	0.9	4	4	6	186.975	0.135	15.8	8	2	timepoint		paired	2.789817975	29	0.878257823	0.291535442	6
6612	s6612	612	1.5	4	1	6	311.625	0.268	13.7	8	2	timepoint		paired	3.15786829	29	0.901661881	0.285535274	7
6613	s6613	613	1.5	4	2	6	311.625	0.363	13	8	2	timepoint		paired	3.211280366	28	0.873152008	0.197124533	7
6614	s6614	614	1.5	4	3	6	311.625	0.174	10.8	8	2	timepoint		paired	3.198276567	31	0.860900772	0.172803288	7
6615	s6615	615	1.5	4	4	6	311.625	0.226	13.6	8	2	timepoint		paired	3.151565055	31	0.850047102	0.317430103	7
6700	s6700	700	0.3	600	1	6	62.325	0.405	7.78	8	2	timepoint		paired	1.35386834	11	-0.709409824	0.034198624	1
6701	s6701	701	0.3	600	2	6	62.325	0.365	8.97	8	2	timepoint		paired	1.349704159	11	-0.79696911	-0.023632503	1
6702	s6702	702	0.3	600	3	6	62.325	0.313	10	8	2	timepoint		paired	0.480837672	11	-1.064090341	0.067651978	1
6703	s6703	703	0.3	600	4	6	62.325	0.398	8.04	8	2	timepoint		paired	1.171910899	10	-0.807572765	-0.005746951	1
6704	s6704	704	0.6	600	1	6	124.65	0.055	11.4	8	2	timepoint		paired	2.81311868	22	0.13529472	-0.184776859	6
6705	s6705	705	0.6	600	2	6	124.65	0.108	12	8	2	timepoint		paired	2.943380747	24	-0.056927573	-0.033171552	6
6706	s6706	706	0.6	600	3	6	124.65	0.056	11	8	2	timepoint		paired	3.28283052	29	0.153424533	-0.279747601	6
6707	s6707	707	0.6	600	4	6	124.65	0.074	11.5	8	2	timepoint		paired	2.894978551	22	0.21985462	-0.229831477	5
6708	s6708	708	0.9	600	1	6	186.975	0.123	14.8	8	2	timepoint		paired	3.492609087	39	0.444168866	-0.411057656	8
6709	s6709	709	0.9	600	2	6	186.975	0.101	11.8	8	2	timepoint		paired	3.582366304	46	0.537496411	-0.272692566	8
6710	s6710	710	0.9	600	3	6	186.975	0.106	13	8	2	timepoint		paired	3.370849439	36	0.430558721	-0.351163754	9
6711	s6711	711	0.9	600	4	6	186.975	0.383	9.55	8	2	timepoint		paired	3.208753903	19	0.500619207	-0.058791434	8
6712	s6712	712	1.5	600	1	6	311.625	0.108	16.8	8	2	timepoint		paired	3.363171845	30	0.523252347	-0.265876368	7
6713	s6713	713	1.5	600	2	6	311.625	0.117	11	8	2	timepoint		paired	3.493891522	31	0.470748933	-0.278484838	8
6714	s6714	714	1.5	600	3	6	311.625	0.217	16.8	8	2	timepoint		paired	3.553789592	36	0.635637703	-0.020239877	8
6715	s6715	715	1.5	600	4	6	311.625	0.095	25.6	8	2	timepoint		paired	3.048881271	31	0.602712636	-0.242081185	8
7100	s7100	100	0.1	1	1	7	24.2		39.2	2	1	timepoint		paired	2.687022131	24	0.410057284	0.636776915
7101	s7101	101	0.1	1	2	7	24.2		35.4	2	1	timepoint		paired	2.477525406	21	0.326055372	0.859701786
7102	s7102	102	0.1	1	3	7	24.2		16.1	2	1	timepoint		paired	2.246848943	24	0.143478853	0.931445453
7103	s7103	103	0.1	1	4	7	24.2		35.2	2	1	timepoint		paired	1.9971345	16	0.234007895	0.967026331
7104	s7104	104	0.1	4	1	7	24.2		55.4	2	1	timepoint		paired	1.308477296	14	0.107909036	1.096241776
7105	s7105	105	0.1	4	2	7	24.2		14.7	2	1	timepoint		paired	1.396054337	8	-0.603567617	0.530678603
7106	s7106	106	0.1	4	3	7	24.2		22.6	2	1	timepoint		paired	1.251530347	7	-0.052160165	1.045383156
7107	s7107	107	0.1	4	4	7	24.2		33.2	2	1	timepoint		paired	1.1865794	9	0.100091269	1.112205415
7108	s7108	108	0.1	16	1	7	24.2		12.5	2	1	timepoint		paired	0.198831821	8	-1.086100447	0.091961037
7109	s7109	109	0.1	16	2	7	24.2		22.2	2	1	timepoint		paired	1.270098915	18	-0.621158945	0.593422532
7110	s7110	110	0.1	16	3	7	24.2		27	2	1	timepoint		paired	1.529596605	13	0.077340307	0.922292492
7111	s7111	111	0.1	16	4	7	24.2		20.4	2	1	timepoint		paired	0.401591574	10	-1.125939954	0.069614927
7112	s7112	112	0.1	600	1	7	24.2		16.7	2	1	timepoint		paired	1.246733338	5	-0.879577975	-0.018848706
7114	s7114	114	0.1	600	3	7	24.2		10.5	2	1	timepoint		paired	0.061913609	11	-1.13711822	0.066729036
7115	s7115	115	0.1	600	4	7	24.2		30.8	2	1	timepoint		paired	0.022617378	4	-1.132068552	0.067376228
8100	s8100	100	0.1	1	1	8	27.7		41.4	2	1	timepoint		paired	2.162825508	21	0.554427092	0.861887397
8101	s8101	101	0.1	1	2	8	27.7		48	2	1	timepoint		paired	2.048579957	20	0.369314497	0.946184981
8102	s8102	102	0.1	1	3	8	27.7		34.2	2	1	timepoint		paired	1.928935491	20	0.147362467	0.988897657
8103	s8103	103	0.1	1	4	8	27.7		34.4	2	1	timepoint		paired	1.756851206	16	0.173598083	1.014795147
8104	s8104	104	0.1	4	1	8	27.7		52.4	2	1	timepoint		paired	1.196112497	12	0.163577951	1.120413421
8105	s8105	105	0.1	4	2	8	27.7		16.6	2	1	timepoint		paired	1.418548185	11	-0.617712413	0.54220487
8106	s8106	106	0.1	4	3	8	27.7		16.2	2	1	timepoint		paired	1.263385624	8	-0.010984587	1.060781067
8107	s8107	107	0.1	4	4	8	27.7		75.4	2	1	timepoint		paired	1.099267815	4	0.097063192	1.127074125
8108	s8108	108	0.1	16	1	8	27.7		15.4	2	1	timepoint		paired	0.162978587	7	-1.098722899	0.076342219
8109	s8109	109	0.1	16	2	8	27.7		39	2	1	timepoint		paired	0.890838283	7	-0.812228898	0.361861609
8110	s8110	110	0.1	16	3	8	27.7		29.4	2	1	timepoint		paired	1.495798969	11	0.050553036	0.829129399
8111	s8111	111	0.1	16	4	8	27.7		25.8	2	1	timepoint		paired	0.290591885	6	-1.116439735	0.068946002
8112	s8112	112	0.1	600	1	8	27.7		19.9	2	1	timepoint		paired	1.266936238	6	-0.871702127	-0.023288637
8114	s8114	114	0.1	600	3	8	27.7		15.8	2	1	timepoint		paired	0.041346319	6	-1.12885715	0.066417703
8115	s8115	115	0.1	600	4	8	27.7		31	2	1	timepoint		paired	0.052663057	4	-1.124334286	0.067331324
9100	s9100	100	0.1	1	1	9	31.2		44.4	2	1	timepoint		paired	2.082507951	27	0.489494885	0.920605562
9101	s9101	101	0.1	1	2	9	31.2		23.4	2	1	timepoint		paired	2.133268174	23	0.403056664	0.942944065
9102	s9102	102	0.1	1	3	9	31.2		16.8	2	1	timepoint		paired	1.92554501	20	0.127875795	0.990549197
9103	s9103	103	0.1	1	4	9	31.2		36	2	1	timepoint		paired	1.748103976	17	0.14990695	1.024420805
9104	s9104	104	0.1	4	1	9	31.2		40.4	2	1	timepoint		paired	1.368818532	12	0.18805522	1.073295771
9105	s9105	105	0.1	4	2	9	31.2		41	2	1	timepoint		paired	1.351129374	12	-0.605396769	0.563407121
9106	s9106	106	0.1	4	3	9	31.2		30	2	1	timepoint		paired	1.234781901	6	-0.093678517	1.028975432
9107	s9107	107	0.1	4	4	9	31.2		38	2	1	timepoint		paired	1.160531462	6	0.090966814	1.113282917
9108	s9108	108	0.1	16	1	9	31.2		20.6	2	1	timepoint		paired	0.361196346	6	-1.02715127	0.140653298
9109	s9109	109	0.1	16	2	9	31.2		19.5	2	1	timepoint		paired	1.076225614	8	-0.664149988	0.531448139
9110	s9110	110	0.1	16	3	9	31.2		21	2	1	timepoint		paired	1.606170572	17	0.131438374	0.763804183
9111	s9111	111	0.1	16	4	9	31.2		22.4	2	1	timepoint		paired	0.41878377	5	-1.067480708	0.107757821
9112	s9112	112	0.1	600	1	9	31.2		18.9	2	1	timepoint		paired	1.291269382	5	-0.840572197	-0.039954465
9114	s9114	114	0.1	600	3	9	31.2		17.6	2	1	timepoint		paired	0.036133132	5	-1.129907306	0.067213326
9115	s9115	115	0.1	600	4	9	31.2		28	2	1	timepoint		paired	0.033244127	6	-1.130303275	0.067025664
