# Supplementary figures and images for: Environmental fluctuations reshape an unexpected diversity-disturbance relationship in a microbial community
Source: eLife journal article supplement (doi:10.7554/elife.67175), 2021-09-03

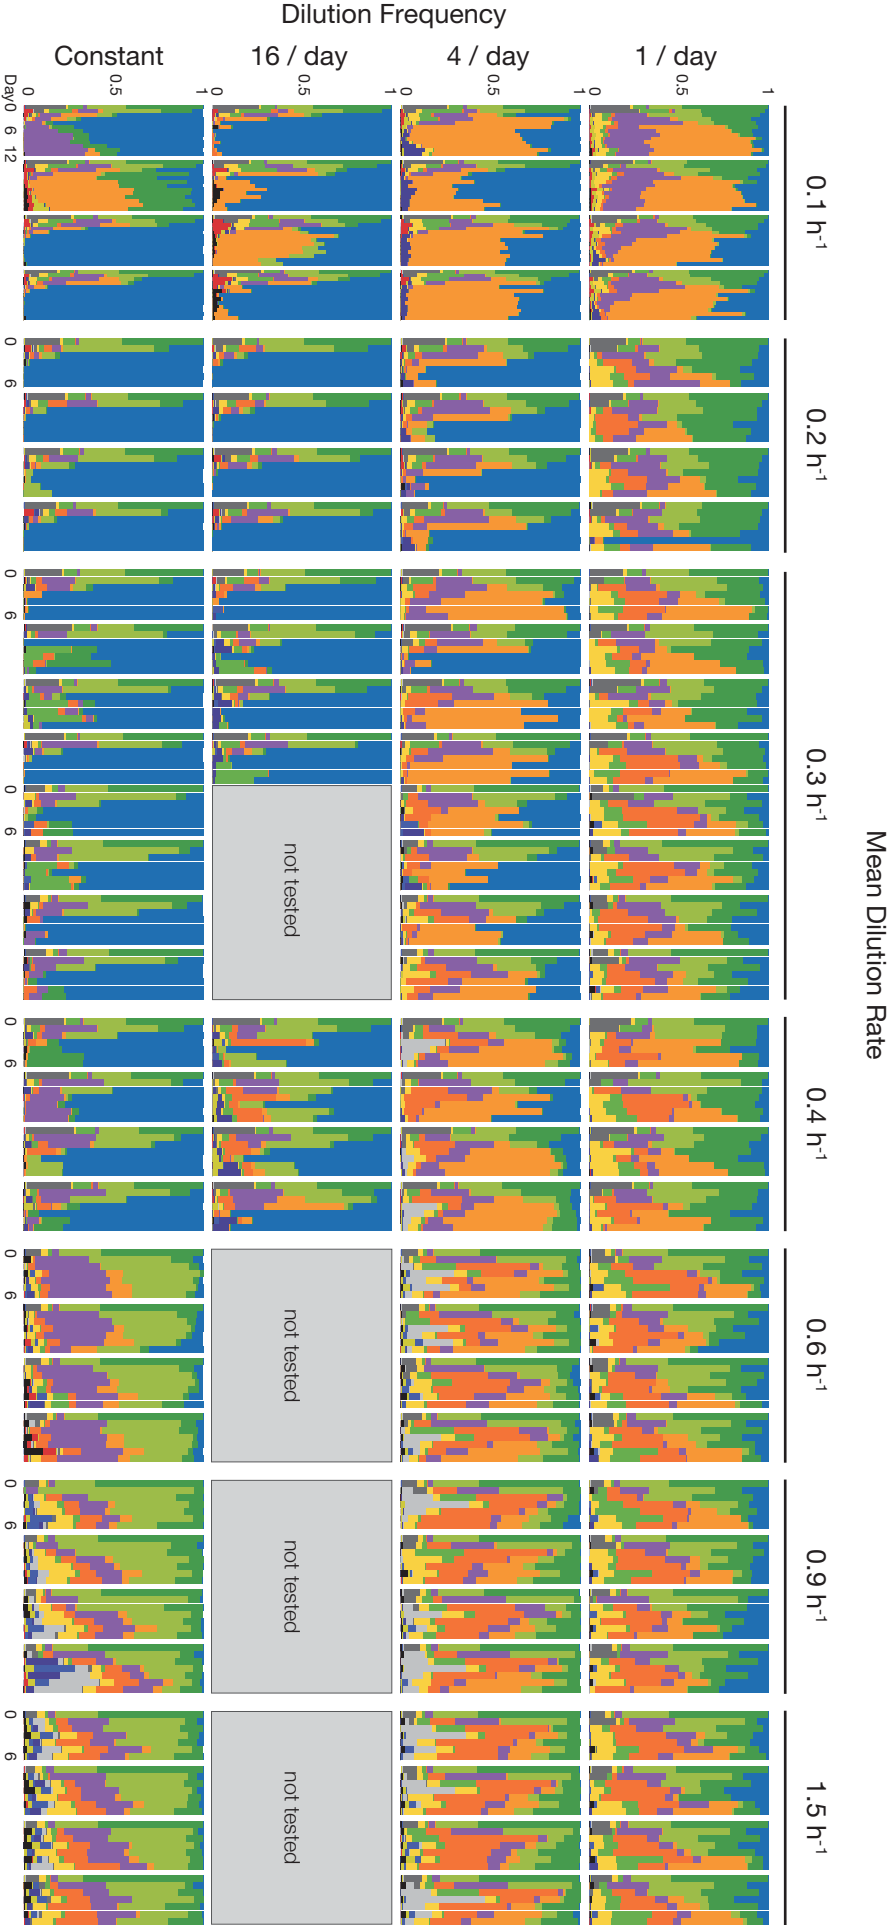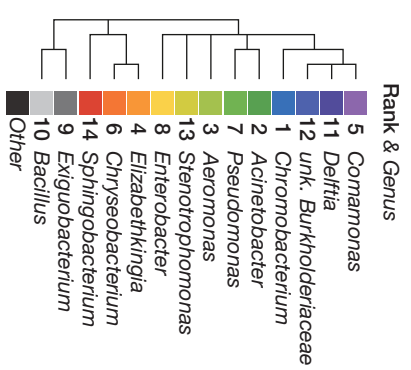

Supplement: supp [file elife-67175-supp-v1.zip]

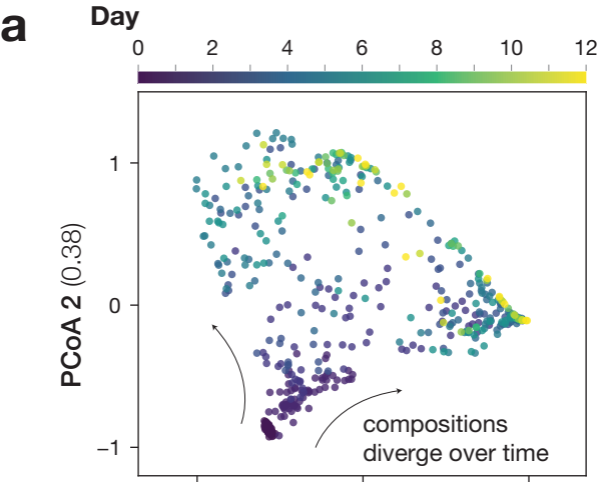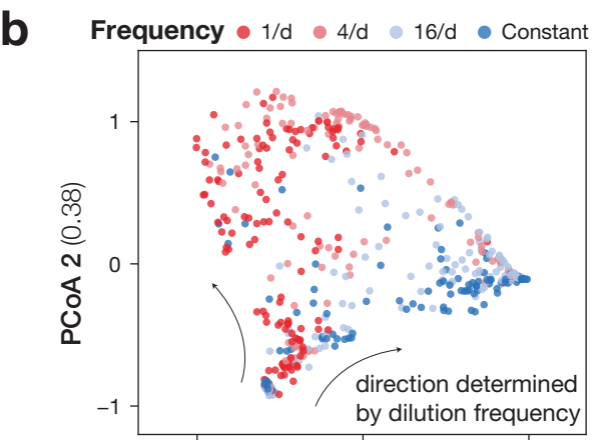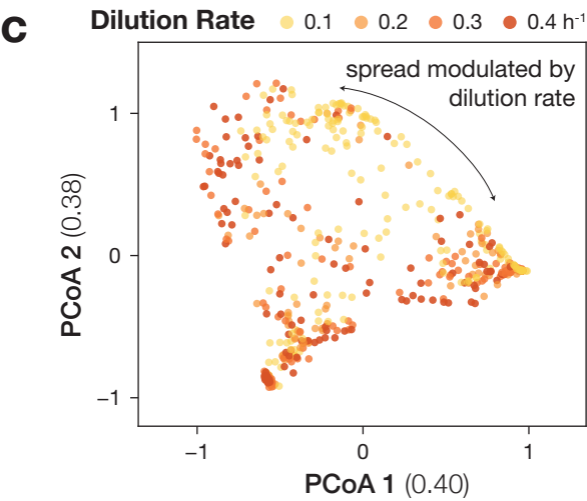

Supplement: supp [file elife-67175-supp-v1.zip]

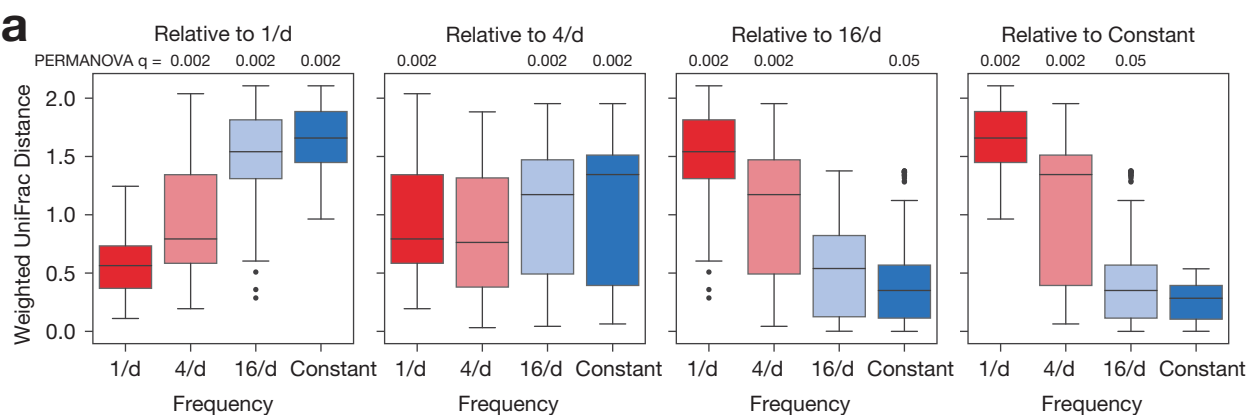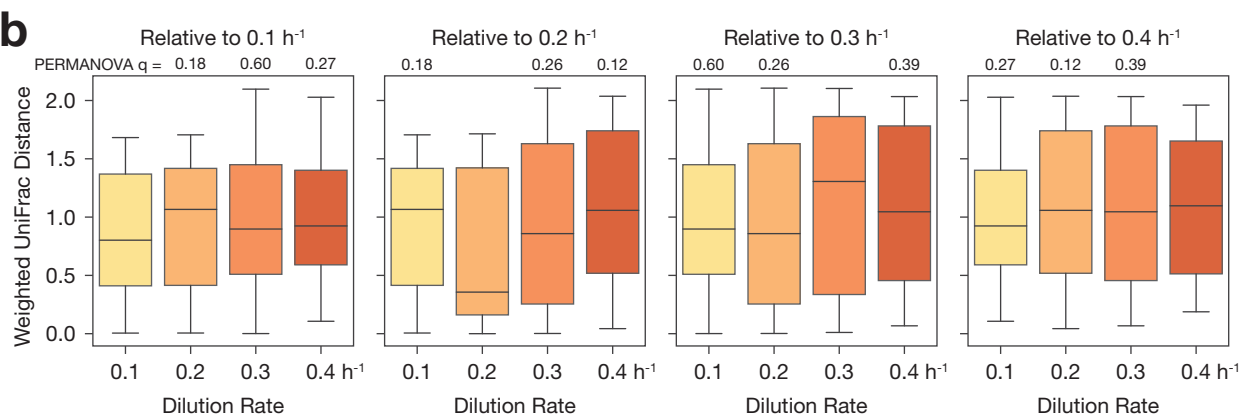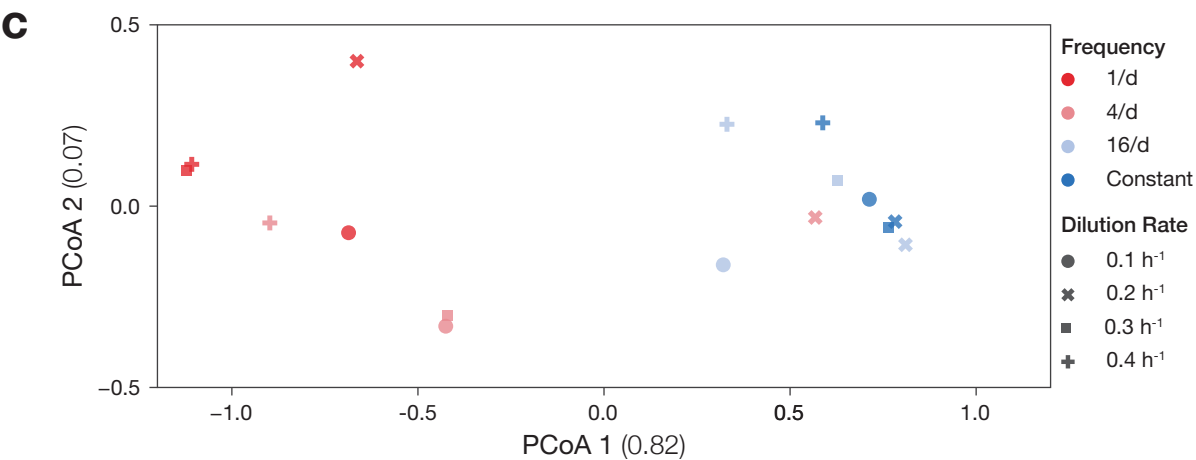

Supplement: supp [file elife-67175-supp-v1.zip]

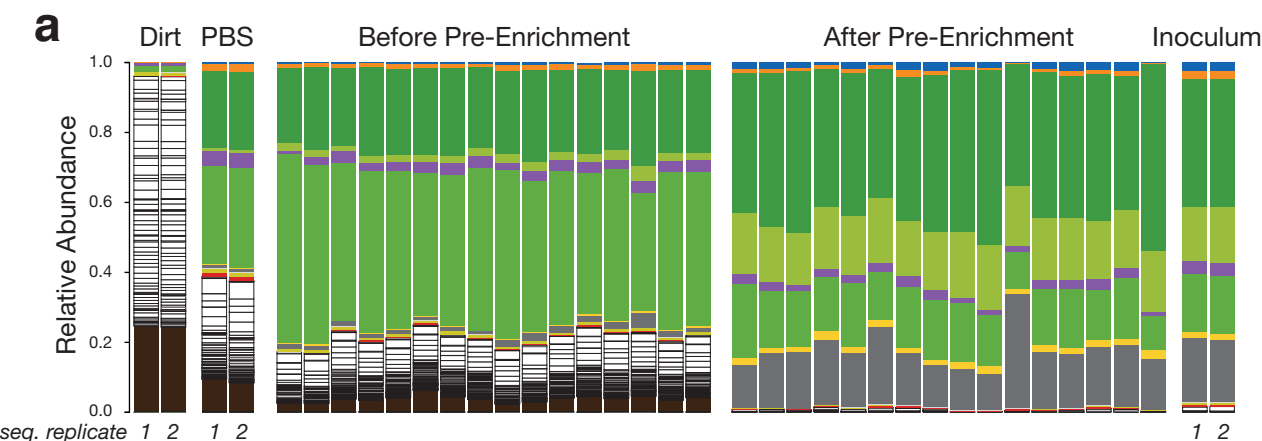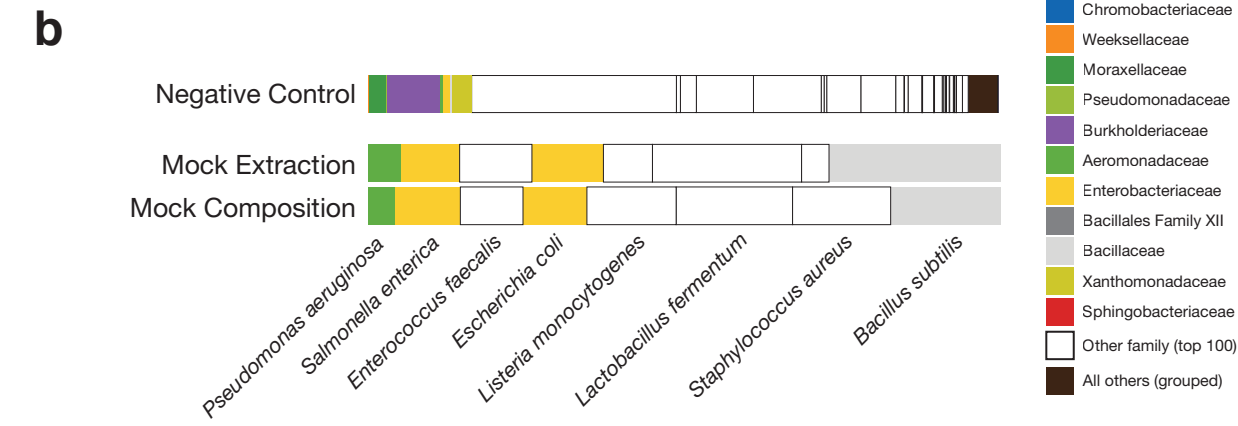

Supplement: supp [file elife-67175-supp-v1.zip]

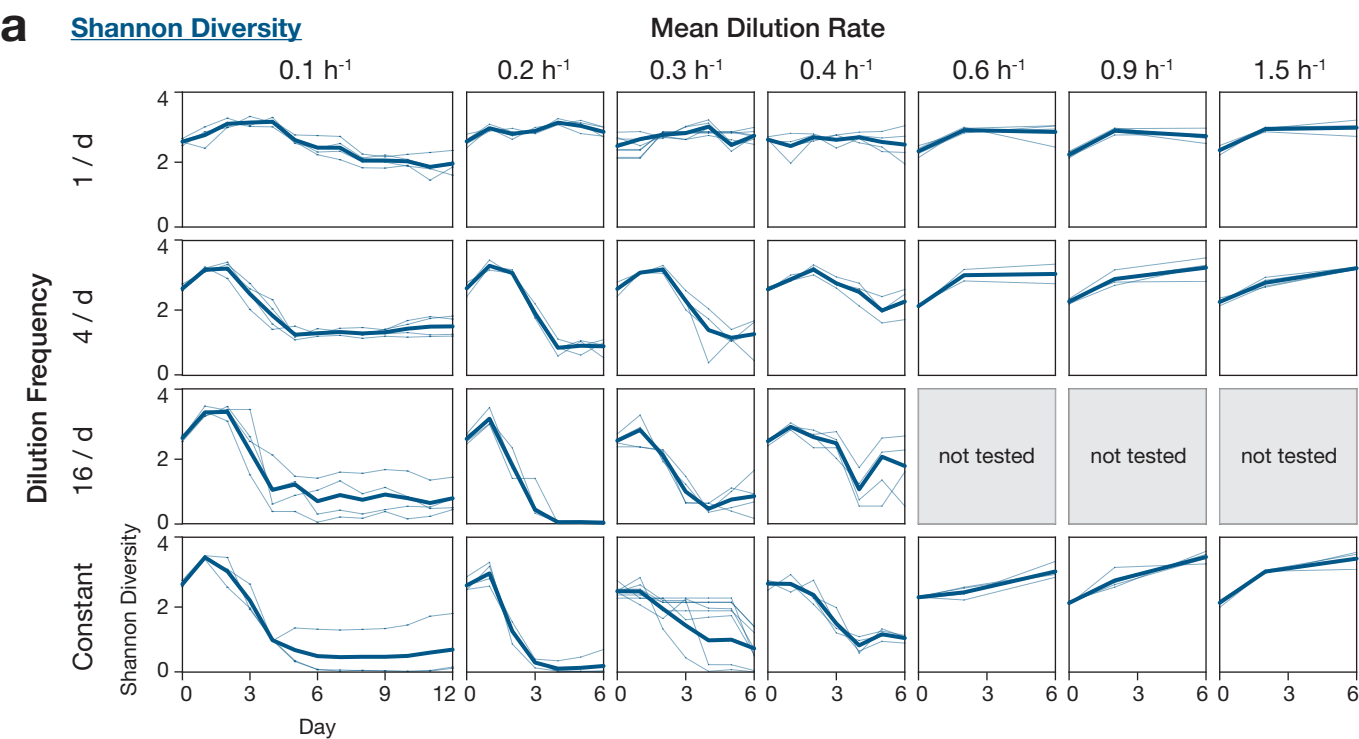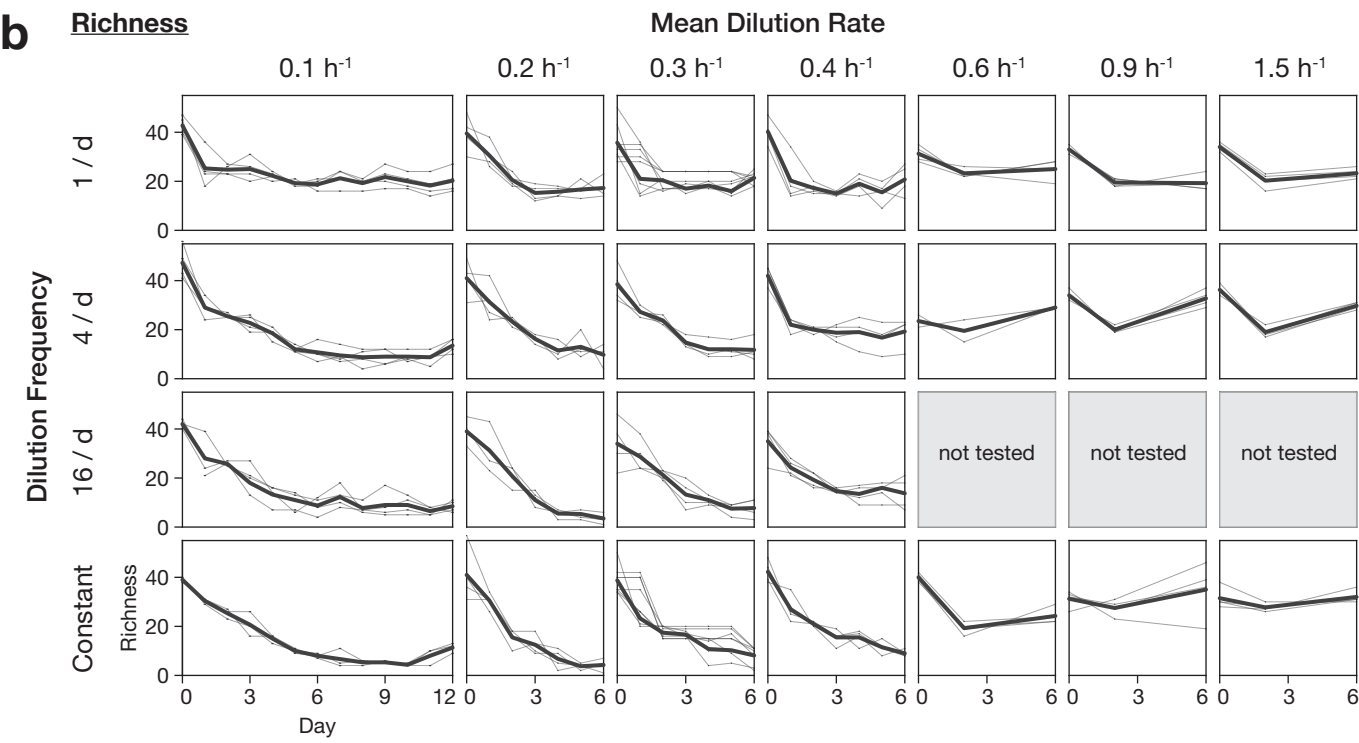

Supplement: supp [file elife-67175-supp-v1.zip]

**a**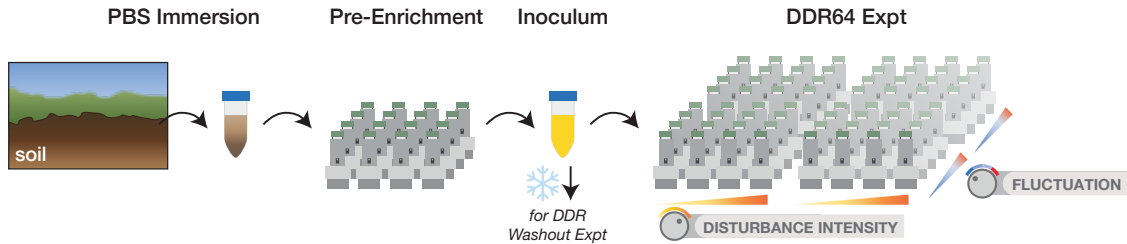**b**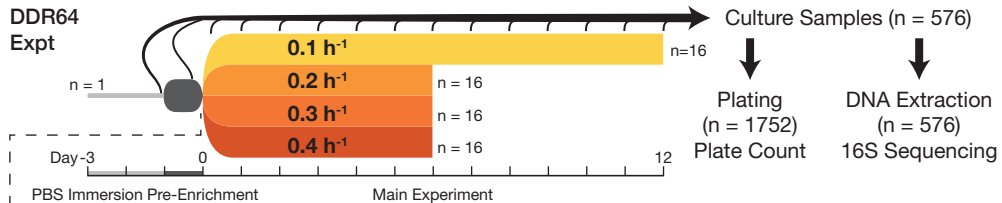**c**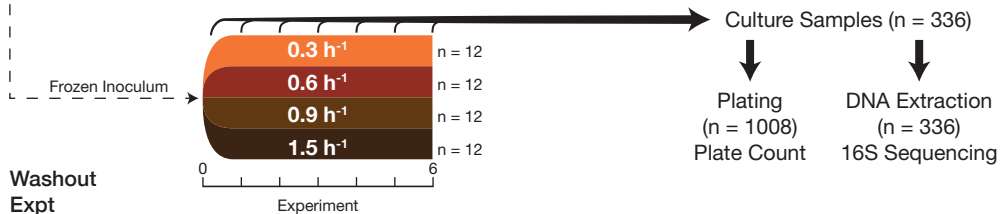

Supplement: supp [file elife-67175-supp-v1.zip › elife_poa_e67175_Figure_3_figure_supplement_1.pdf]

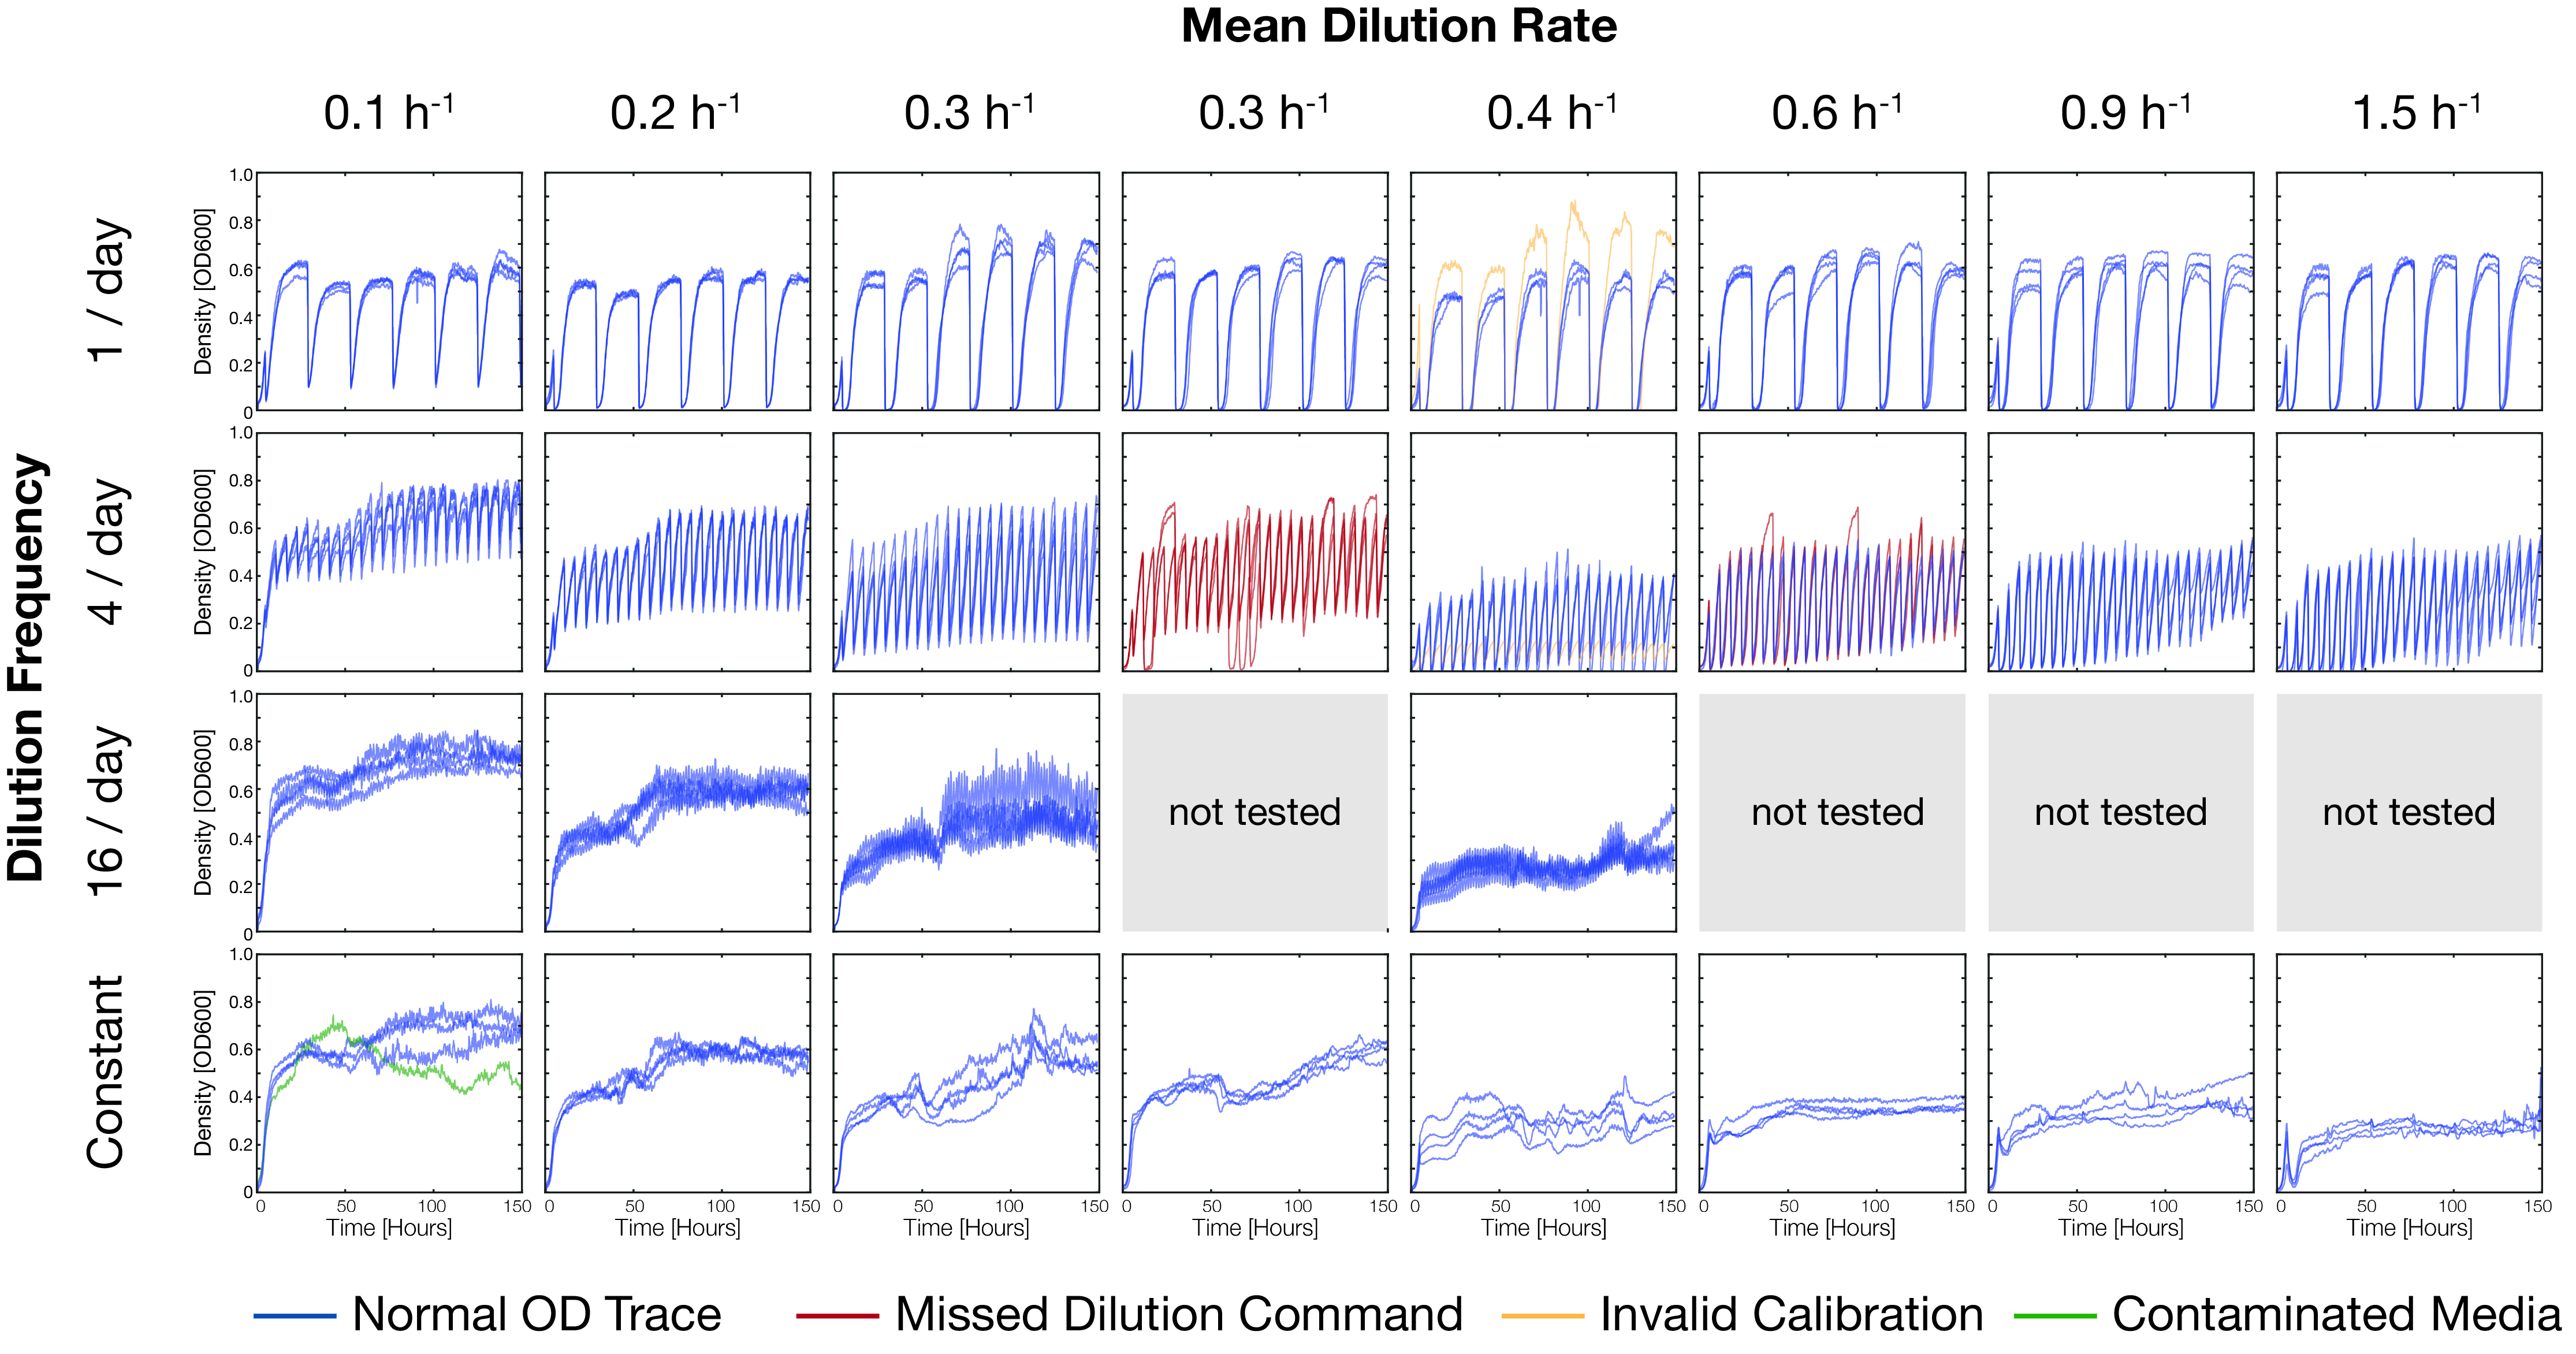

Supplement: supp [file elife-67175-supp-v1.zip › elife_poa_e67175_Figure_3_figure_supplement_3.jpg]

**a**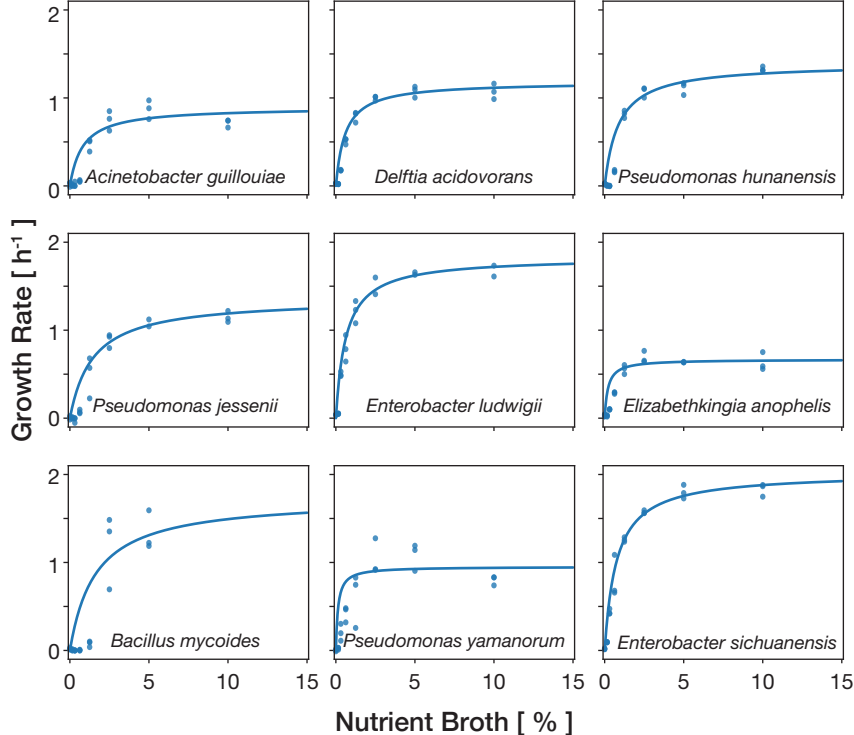**b**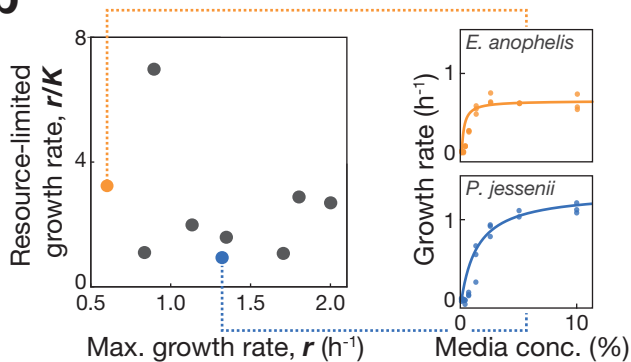**c**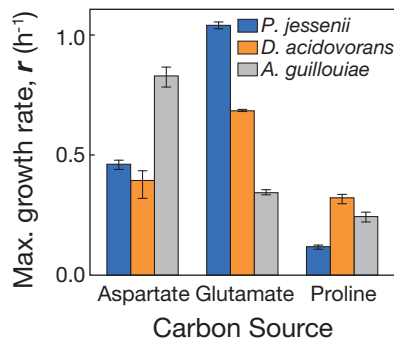

Supplement: supp [file elife-67175-supp-v1.zip › elife_poa_e67175_Figure_3_figure_supplement_4.pdf]

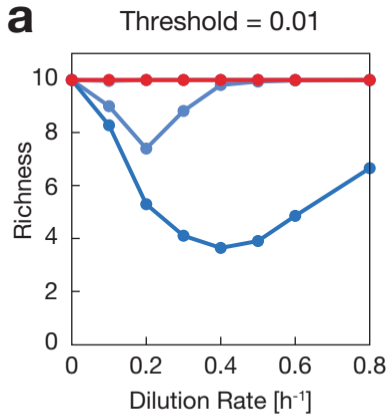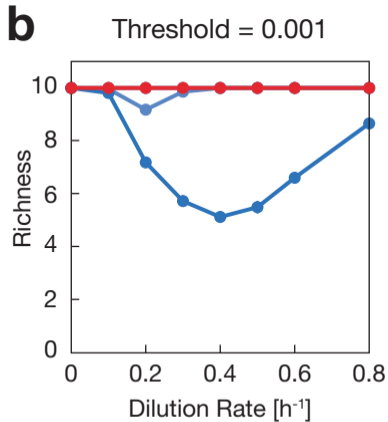

**Frequency**    1 / day    4 / day    16 / day    32 / day    64 / day

Supplement: supp [file elife-67175-supp-v1.zip › elife_poa_e67175_Figure_3_figure_supplement_5.pdf]

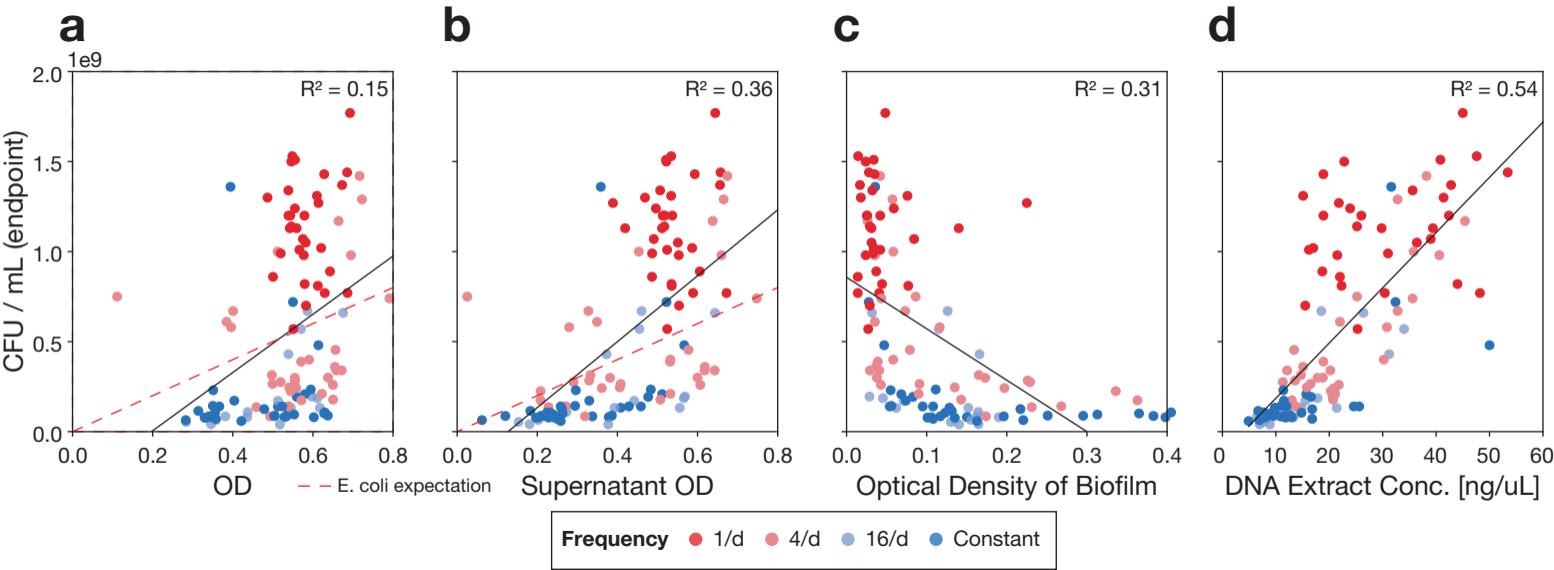

Supplement: supp [file elife-67175-supp-v1.zip › elife_poa_e67175_Figure_3_figure_supplement_6.pdf]

**a**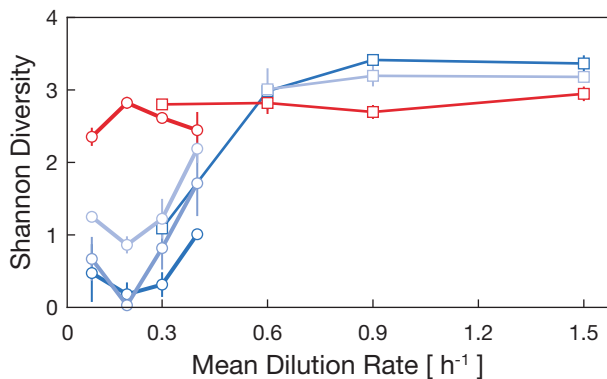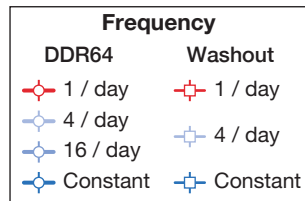**b**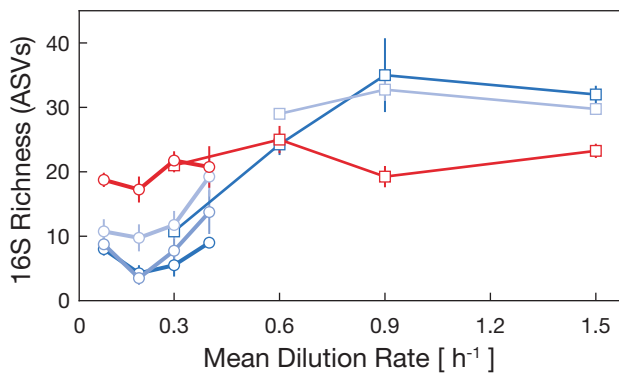**c**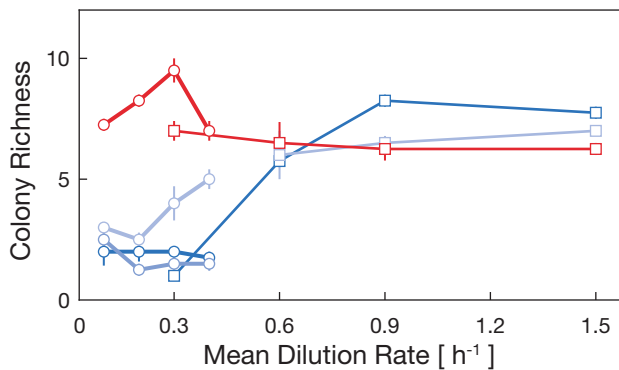

Supplement: supp [file elife-67175-supp-v1.zip › elife_poa_e67175_Figure_3_figure_supplement_11.pdf]

# Optical Density of Biofilm (culture removed)

Dilution Frequency

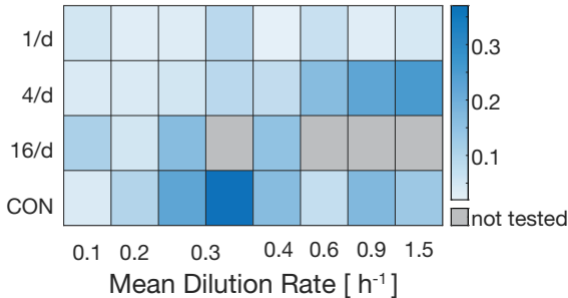

Supplement: supp [file elife-67175-supp-v1.zip › elife_poa_e67175_Figure_3_figure_supplement_12.pdf]

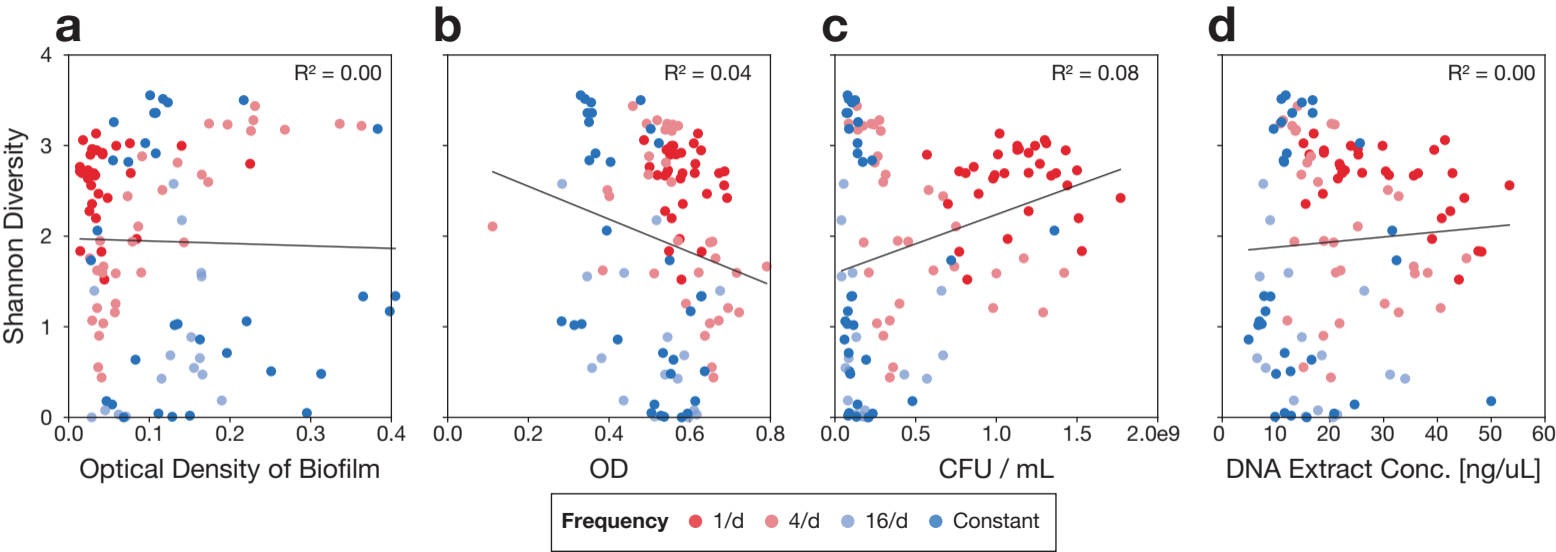

Supplement: supp [file elife-67175-supp-v1.zip › elife_poa_e67175_Figure_3_figure_supplement_13.pdf]
